# **Pentatricopeptide repeat poly(A) binding protein from mitochondria of trypanosomes**

**Mikhail V. Mesitov<sup>1</sup>, Tian Yu<sup>1,2</sup>, Takuma Suematsu<sup>1</sup>, Francois M. Sement<sup>1</sup>, Liye Zhang<sup>3</sup>, Clinton Yu<sup>4</sup>, Lan Huang<sup>4</sup> and Inna Aphasizheva<sup>1,\*</sup>**

<sup>1</sup>Department of Molecular and Cell Biology, Boston University Medical Campus, Boston, MA 02118, USA;

<sup>2</sup>Bioinformatics Program, Boston University, Boston, MA 02215, USA;

<sup>3</sup>School of Life Science and Technology, ShanghaiTech University, Shanghai 201210, China;

<sup>4</sup>Department of Physiology and Biophysics, School of Medicine, University of California, Irvine, CA 92697, USA

**\*Corresponding author:** Inna Aphasizheva, Department of Molecular and Cell Biology,

72 E. Concord St., E424, Boston, MA 02118, USA

**Email:** [innaaf@bu.edu](mailto:innaaf@bu.edu); **Fax:** 617 414 1056; **Phone:** 617 358-3780.

<https://orcid.org/0000-0003-2695-2950>

1 **Abstract**

2

3 In *Trypanosoma brucei*, most mitochondrial mRNAs undergo U-insertion/deletion editing, and 3'  
4 adenylation and uridylation. The internal sequence changes and terminal extensions are  
5 coordinated: Pre-editing addition of the short (A) tail protects the edited transcript against 3'-5'  
6 degradation, while post-editing A/U-tailing renders mRNA competent for ribosome recruitment.  
7 Participation of a poly(A) binding protein (PABP) in coupling of editing and 3' modification  
8 processes has been inferred, but its identity and mechanism of action remained elusive. We  
9 report identification of KPAF4, a pentatricopeptide repeat-containing PABP which sequesters  
10 the A-tail and impedes exonucleolytic degradation. Conversely, KPAF4 inhibits uridylation of  
11 A-tailed transcripts and, therefore, premature A/U-tailing of partially-edited mRNAs. This  
12 quality check point prevents translation of incompletely edited mRNAs. Our findings also  
13 implicate the RNA editing substrate binding complex (RESC) in mediating the interaction  
14 between the 5' end bound pyrophosphohydrolase MERS1 and 3' end associated KPAF4 to enable  
15 mRNA circularization. This event is critical for transcript stability during the editing process.

16

17 **Key words:** Trypanosoma, mitochondria, polyadenylation, RNA stability, RNA editing, PPR  
18 protein.

19

20 The parasitic hemoflagellate *Trypanosoma brucei* (*T. brucei*) maintains a mitochondrial genome  
21 composed of catenated maxicircles and minicircles. A few 23-kb maxicircles encode 9S and 12S  
22 rRNAs, six protein-coding and 12 encrypted genes, a *trans*-acting MURF2-II and *cis*-acting CO2  
23 guide RNAs (gRNA). Thousands of 1-kb minicircles produce gRNAs that direct U-  
24 insertion/deletion editing of cryptic maxicircle transcripts, thus giving rise to open reading  
25 frames<sup>1-3</sup>. Messenger and ribosomal RNA precursors are transcribed from individual promoters<sup>4</sup>  
26 and processed by 3'-5' exonucleolytic trimming, which is followed by adenylation or uridylation,  
27 respectively. Trimming is accomplished by a DSS1 3'-5' exonuclease<sup>5</sup> acting as subunit of the  
28 mitochondrial processome (MPsome), which also contains an RNA editing TUTase 1 (RET1)  
29 and several structural polypeptides<sup>6</sup>. Binding of the pentatricopeptide (35 amino acids) repeat  
30 (PPR) Kinetoplast Polyadenylation Factor 3 (KPAF3) to purine-rich sequences near the encoded  
31 3' end recruits KPAP1 poly(A) polymerase and channels pre-mRNA into the adenylation/editing  
32 pathway<sup>7,8</sup>. Conversely, rRNAs lacking KPAF3 binding sites upstream of the MPsome-generated  
33 3' end are uridylated by RET1 TUTase<sup>7</sup>. The U-tails decorating ribosomal<sup>9</sup> and guide RNAs<sup>10</sup>  
34 reflect a mechanism in which antisense transcripts impede 3'-5' trimming thereby creating a  
35 kinetic “window of opportunity” for U-tail addition<sup>6,7</sup>. Thus, uridylation terminates rRNA and  
36 gRNA precursor degradation, but the resultant U-tails do not appreciably influence the stability  
37 of mature molecules<sup>11,12</sup>. In contrast, short A-tails (20-25 nt) exert profound and opposite effects  
38 on mRNA decay depending upon the molecule's editing status. Knockdown of KPAP1 poly(A)  
39 polymerase leads to moderate upregulation of non-adenylated pre-edited mRNA, but causes a  
40 rapid degradation of the same transcript edited beyond the initial few sites near the 3' end<sup>7,8,13</sup>.  
41 Remarkably, mRNAs containing functional coding sequence that do not require editing, referred  
42 to here as unedited, also rely on KPAF3 binding and ensuing KPAP1-catalyzed A-tailing for

43 stabilization. In massively edited (pan-edited) transcripts, sequence changes typically begin near  
44 the 3' end and proceed in the 3'-5' direction<sup>14</sup>. An unknown signaling mechanism monitors  
45 editing status and triggers short A-tail extension into a long (>200 nt) A/U-heteropolymer upon  
46 completion of the editing process at the 5' region. The A/U-tailing is accomplished by KPAP1  
47 poly(A) polymerase and RET1 TUTase and requires an accessory heterodimer of PPR proteins  
48 KPAF1 and KPAF2. The resultant A/U-tail does not affect the stability, but rather activates  
49 mRNA for translation by enabling binding to the small ribosomal subunit<sup>15</sup>. Thus, the temporally  
50 separated pre-editing A-tailing and post-editing A/U-tailing processes are distinct in their factor  
51 requirements and functions.

52         Selective KPAF3 binding to G-rich pre-edited, but not to U-rich edited sequences, likely  
53 monitors initiation of mRNA editing at the 3' end, which rationalizes the editing-dependent  
54 stability phenomenon<sup>7</sup>. It follows that KPAF3-bound pre-edited mRNA is protected against 3'-5'  
55 degradation and remains stable even in the absence of an A-tail, as reported for KPAP1  
56 knockdown<sup>7,8</sup>. It has been suggested that KPAF3 displacement by the editing sequence changes  
57 would leave the partially-edited transcript reliant on the short A-tail as an critical stability  
58 determinant<sup>7</sup>. This model, however, does not explain the resistance of adenylated RNA to either  
59 degradation by the MPsome, or uridylation by RET1 *in vivo*. Indeed, these features would be  
60 essential for partially-edited mRNA stabilization and for blocking its A/U-tailing, hence  
61 premature translational activation. However, synthetic adenylated RNA represents a susceptible  
62 substrate for degradation by the MPsome<sup>6</sup> and uridylation by RET1<sup>16</sup> *in vitro*.

63         Recent identification of the 5' pyrophosphohydrolase complex (PPsome) introduced  
64 another dimension to the mRNA processing and stabilization pathway<sup>4</sup>. The PPsome is  
65 comprised of three subunits: MERS1, a NUDIX (nucleoside diphosphates linked to x (any

66 moiety)) hydrolase; MERS2 PPR factor; and MERS3, a subunit lacking any motifs. The PPsome  
67 binds the 5' end of a primary transcript and converts the 5' triphosphate moiety incorporated at  
68 transcription initiation into a monophosphate. Intriguingly, MERS1 knockdown severely  
69 compromises edited mRNA stability without affecting 3' polyadenylation. To reconcile these  
70 observations, we hypothesized that poly(A) binding protein (PABP) may inhibit mRNA 3'-5'  
71 degradation and 3' uridylation by sequestering the short A-tail. We further reasoned that PABP  
72 may interact with the PPsome at the 5' end to stabilize mRNA during the editing process. Unable  
73 to identify a canonical RRM motif-containing PABP in mitochondria, we inquired whether a  
74 PPR factor capable of recognizing adenosine stretches may exist. A recognition code developed  
75 for PPRs from land plants suggests that each repeat binds a single nucleotide via amino acid  
76 situated in positions 5 and 35, or the last residue in helix-turn-helix motifs exceeding the  
77 canonical length<sup>17</sup>. For example, a combination of threonine and asparagine in these positions,  
78 respectively, recognizes an adenosine base<sup>18,19</sup>. By searching for repeats with such a pattern  
79 among 38 predicted trypanosomal PPRs<sup>20</sup>, we identified a polypeptide containing five adjacent  
80 repeats that would be predicted to bind as many contiguous adenosines. Termed Kinetoplast  
81 Polyadenylation Factor 4 (KPAF4), this protein interacts with established components of the  
82 polyadenylation and editing complexes and predominantly binds to short A-tails *in vivo*. KPAF4  
83 knockdown downregulates A-tailed edited and unedited mRNAs, but not their A/U-tailed forms.  
84 Remarkably, KPAF4 repression also permitted uridylation of A-tailed pre-edited mRNAs.  
85 Specific KPAF4 binding to adenylated substrate inhibited both 3'-5' RNA degradation by the  
86 MPsome and uridylation by RET1 TUTase *in vitro*. Collectively, our data support a model in  
87 which KPAF4 stabilizes partially and fully edited, and unedited transcripts by binding to the  
88 short A-tail and enabling mRNA circularization.

## 89 **Results**

90

### 91 ***KPAF4 interacts with mitochondrial mRNA processing complexes***

92 To identify a putative mitochondrial PABP, we analyzed the repeat structure and amino acids  
93 occupying positions 5 and 35, or the last position in repeats longer than 35 residues<sup>17</sup>, in  
94 annotated pentatricopeptide repeat-containing polypeptides from *T. brucei*<sup>20</sup>. We searched for  
95 threonine and asparagine residues in these positions, respectively, a combination that binds an  
96 adenosine<sup>18,19</sup>. By considering proteins with at least four adjacent repeats, we identified a  
97 candidate 31.8 kDa protein termed Kinetoplast Polyadenylation Factor 4 (KPAF4,  
98 Tb927.10.10160), which consisted almost entirely of seven PPR repeats predicted with various  
99 degree of confidence. The 6-7 repeat organization is conserved among orthologous proteins in  
100 *Trypanosoma* and *Leishmania* species, while repeats R1 to R5 invariantly possess a T-N  
101 combination (Fig. 1a). Repeats 6 and 7 had the required combination shifted by one position.  
102 Because topology prediction algorithms ranked the probability of mitochondrial targeting at 20-  
103 40%, the KPAF4 localization was confirmed by subcellular fractionation. The C-terminally  
104 TAP-tagged<sup>21</sup> KPAF4 was conditionally expressed in procyclic (insect) form of *T. brucei* and  
105 demonstrated to have been enriched in the mitochondrial matrix by approximately 8-fold. Partial  
106 association with the inner membrane has also been detected (Fig. 1b).

107 To place the candidate protein into a functional context, KPAF4 was isolated by tandem  
108 affinity chromatography (Fig. 1c). Purifications were also conducted from a parental 29-13 cell  
109 line<sup>22</sup> as a control and from RNase I-treated mitochondrial lysate. Final fractions were analyzed  
110 by immunoblotting for established mRNA processing factors (Fig. 1d). KPAP1, KPAF1 and

111 KPAF3, which initiates mRNA adenylation by KPAP1<sup>7</sup>, were readily detectable among proteins  
112 co-purifying with KPAF4, but the KPAP1 and KPAF1 association appears to be RNA-  
113 dependent. RNase treatment also reduced KPAF4 interactions with the PPsome (MERS1<sup>12</sup>),  
114 RNA editing core (REL1/2<sup>23,24</sup>) and substrate binding (GRBC1/2<sup>12,25</sup>) complexes, and KPAF1/2  
115 polyadenylation factor<sup>15</sup>. Only a trace amount of RET1 TUTase<sup>26</sup> was detected in the KPAF4  
116 fraction.

117 Co-purification with protein complexes responsible for mRNA 5' end modification,  
118 editing, A-tailing, and A/U-tailing indicates that KPAF4 likely participates in mRNA processing,  
119 and that some interactions are RNA-dependent. To assess the heterogeneity and apparent  
120 molecular mass of KPAF4-containing particle(s) in relation to established mRNA processing  
121 complexes, mitochondrial lysates from parental and KPAF4-TAP cells were fractionated on  
122 glycerol gradients. Fractions were separated on native gel and analyzed for the polyadenylation,  
123 PPsome, RNA editing core (RECC), and substrate binding (RESC) complexes (Fig. 1e). In  
124 agreement with previous studies, KPAP1 was detected in an unassociated form and bound to an  
125 ~1 MDa complex<sup>7,8</sup>, while KPAF4 was separated into particles of ~300 kDa (I) and ~600 kDa  
126 (II), and attached to an ~1 MDa complex (III, fractions 6 and 7). Notably, RNase pre-treatment  
127 of mitochondrial lysate mostly eliminated the 1MDa KPAF4 complex III but left smaller  
128 particles unaffected. The PPsome and RNA editing substrate binding complex (RESC) co-  
129 fractionated as an ~1MDa particle that closely resembles complex III, while the RECC migrated  
130 as a distinct ~800 kDa particle. Collectively, these results demonstrate that KPAF4 is a  
131 mitochondrial pentatricopeptide repeat factor engaged with at least three macromolecular  
132 complexes. The largest KPAF4-containing complex III with an apparent molecular mass of

133 ~1MDa closely resembles a ribonucleoprotein assembly that encompasses PPsome, RESC and  
134 polyadenylation complexes<sup>4,25</sup>.

135

### 136 *RESC tethers PPsome and polyadenylation complexes*

137 To gain a higher-resolution view of the KPAF4 interactome, the normalized spectral abundance  
138 factors (NSAF)<sup>27</sup> were derived from LC-MS/MS analysis of tandem affinity purified complexes  
139 and used to build an interaction network (Fig. 2a). Polyadenylation enzyme KPAP1 and factors  
140 KPAF1, KPAF2 and KPAF3 were analyzed along with the MERS1 subunit of the PPsome<sup>7,8,25</sup>.  
141 The strongest predicted KPAF4 interactions included those with a hypothetical protein lacking  
142 any discernible motifs, Tb927.3.2670, and with the polyadenylation mediating module (PAMC)  
143 of the RNA editing substrate binding complex<sup>25</sup>. KPAP1 and KPAF3 also featured prominently  
144 among KPAF4-associated proteins. Interestingly, relatively high levels of MRP1 and MRP2  
145 were detected in KPAF4 preparation (Supplementary Table 1). A subject of extensive  
146 investigation, heterotetramer MRP1/2 RNA chaperone displays RNA annealing activity *in vitro*,  
147 but its definitive function remains undetermined<sup>28-31</sup>. The ternary interaction between KPAF4,  
148 Tb927.3.2670, and the MRP1/2 RNA chaperone complex was verified by cross-tagging of  
149 MRP2 and the hypothetical protein. Mass spectrometry analysis of samples purified from  
150 RNase-treated extracts indicated that interactions between KPAP1 poly(A) polymerase, and  
151 KPAF1-2 and KPAF3 polyadenylation factors are sufficiently stable to withstand a two-step  
152 purification, but nonetheless depend on an RNA component (Supplementary Table 1). KPAF4–  
153 MRP1/2–Tb927.3.2670 co-purification, on the other hand, was unaffected by RNase treatment.  
154 Importantly, the network predicted that the RESC complex may facilitate co-complex  
155 interactions between the PPsome and KPAF4.



156 To corroborate the interaction network inferences, we investigated the proximity of  
157 KPAF4, polyadenylation, RESC and PPsome complexes by *in vivo* biotinylation (BioID<sup>32</sup>),  
158 which has an estimated 10 nm labeling range<sup>33</sup>. KPAP1, GRBC2, MERS1, and KPAF4 were  
159 conditionally expressed as C-terminal fusions with BirA\* biotin ligase and biotinylation was  
160 induced for 24 hours. Labeled proteins were purified under denaturing conditions and analyzed  
161 by LC-MS/MS (Fig. 2b and Supplementary Table 2). The BioID experiments placed KPAP1 in  
162 proximity to the KPAF2 polyadenylation factor, subunits P3 and P4 of the polyadenylation  
163 mediator module (PAMC), and Tb927.3.2670. Surprisingly, MRP2 emerged as the major  
164 biotinylated protein in cells expressing KPAP1, MERS1 and GRBC2 fusions with BirA\*. In  
165 aggregate, the co-purification, apparent molecular mass assessment of KPAF4 complexes and *in*  
166 *vivo* proximity studies suggest that KPAF4 interacts with the mitochondrial polyadenylation and  
167 RNA editing substrate binding complexes. It seems plausible that GRBC and REMC modules of  
168 the latter mediate the co-complex interaction between KPAF4 and the PPsome.

169

### 170 ***KPAF4 is essential for parasite growth and for maintaining a subset of mitochondrial mRNAs***

171 The potential role of KPAF4 in mitochondrial RNA processing and parasite viability was  
172 examined in the insect (procyclic) form of *T. brucei*. Inducible RNAi knockdown efficiently  
173 downregulated KPAF4 mRNA (Fig. 3a) and triggered a cell growth inhibition phenotype after  
174 approximately 24 hours, indicating that KPAF4 is essential for normal cellular function (Fig. 3b).  
175 Quantitative RT-PCR of RNA samples isolated at 55 hours post-RNAi induction demonstrated  
176 divergent effects of KPAF4 knockdown on mRNA abundance. Downregulation of moderately  
177 edited (CYB and MURF2), and some pan-edited (RPS12, ND3 and CO3) mRNAs was  
178 accompanied by upregulation of their respective pre-edited forms. The transcript-specific effects

179 were also apparent for unedited transcripts that either remained relatively steady (CO1 and ND5)  
180 or increased (ND1, MURF1 and ND4). Finally, mitochondrial ribosomal RNAs remained  
181 virtually unaffected, which indicates an mRNA-specific KPAF4 function (Fig. 3c). We next  
182 tested whether these effects may have been caused by KPAF4 RNAi-induced changes in steady-  
183 state levels of known processing factors. Immunoblotting analysis showed that KPAP1 poly(A)  
184 polymerase was downregulated by approximately 50% in KPAF4 RNAi background while other  
185 tested enzymes and RNA binding proteins remained unchanged (Fig. 3d).

186

### 187 ***KPAF4 knockdown differentially affects mRNAs depending on their editing status***

188 Albeit instructive, the global changes in relative abundance provide limited information about 3'  
189 modifications and their correlation with mRNA editing status. To assess whether moderate  
190 KPAP1 decline in the KPAF4 RNAi background (Fig. 3d) may have compromised mRNA  
191 adenylation, we performed time-resolved analysis of pan-edited mRNAs. The representative  
192 example, RPS12 mRNA, constitutes a single domain in which editing initiates close to the  
193 polyadenylation site and traverses the entire transcript in a 3'–5' hierarchical order as directed by  
194 multiple overlapping gRNAs<sup>14</sup>. Samples from KPAF3 knockdown cells were also separated by  
195 high resolution gel electrophoresis to typify impeded mRNA adenylation and accelerated decay<sup>7</sup>.  
196 Northern blotting with probes for pre-edited, partially-edited (~70% completed, 5' region not  
197 edited) and fully-edited variants also distinguishes non-adenylated, A-tailed and A/U-tailed  
198 mRNAs (Fig. 4a, Supplementary Fig.1). Upon KPAF3 repression, an initial loss of the short A-  
199 tail (0 – 48 hours of RNAi induction), was followed by rapid mRNA degradation. In contrast,  
200 KPAF4 knockdown led to lengthening and, in agreement with qRT-PCR results (Fig. 3c), to a  
201 moderate increase in pre-edited mRNA abundance. While partially-edited mRNA patterns

202 mirrored the loss of the pre-edited form in KPAF3 knockdown, similar populations remained  
203 virtually unchanged in length and abundance with progression of KPAF4 RNAi. The fully-edited  
204 transcripts displayed a more complex pattern in KPAF4-depleted cells: The A-tailed form  
205 declined while the A/U-tailed form remained unaffected. To investigate the unexpected  
206 lengthening of pre-edited RNAs in KPAF4 knockdown cells, the 3' extensions were amplified,  
207 cloned and sequenced. In agreement with a previous report for the parental 29-13 strain of *T.*  
208 *brucei*<sup>8</sup>, in 96 clones obtained from mock-induced KPAF4 RNAi short A-tails varied within 20-  
209 25 nt range (not shown). Remarkably, A-tails not only persisted in KPAF4 knockdown, but in  
210 ~30% of clones were extended into oligo(U) stretches (Fig. 4b and Supplementary Table 3).  
211 These results demonstrate that, unlike KPAF3, KPAF4 is not required for pre-edited mRNA  
212 stabilization and adenylation, but it may prevent spurious uridylation of A-tailed transcripts. The  
213 disposition apparently changes with progression of editing in KPAF4 RNAi background: Fully-  
214 edited short A-tailed mRNAs decline while A/U-tailed transcript remain unaffected. It follows  
215 that KPAF4 may stabilize fully-edited A-tailed mRNA but is not required for its A/U-tailing  
216 upon completion of editing.

217         Extending northern blotting analysis to another pan-edited mRNA encoding subunit A6  
218 of ATP synthase showed a similar response to KPAF4 depletion: substantial lengthening and  
219 upregulation of pre-edited RNA accompanied by downregulation of the edited A-tailed form  
220 (Fig. 4c). In moderately-edited CYB mRNA, where 34 uridines are inserted close to the 5' end,  
221 the pre-edited form was upregulated while the edited variant behaved like pan-edited mRNAs  
222 (Fig. 4d). In unedited mRNAs, such as CO1 and ND1, short A-tailed populations also declined  
223 while A/U-tailed ND1 increased more than 10-fold (Fig. 4e, Supplementary Fig.1). Finally, the  
224 lack of detectable impact on ribosomal RNAs (Fig. 4f), which are also produced from maxicircle

225 and normally uridylated, confirmed that KPAF4 is an mRNA-specific factor. Minicircle-derived  
226 gRNAs were either unaffected, such as gA6(14), or moderately upregulated, as in the case of  
227 gCO3(147) (Fig. 4g). The latter effect correlates with a loss of corresponding edited CO3 mRNA  
228 (Fig. 3c), as reported for genetic knockdowns that eliminate edited mRNAs<sup>11</sup>. Thus, the  
229 outcomes of KPAF4 knockdown are consistent with its hypothetical function as a poly(A)  
230 binding protein: stabilization of A-tailed edited mRNA that is no longer bound by KPAF3<sup>7</sup>, but  
231 not yet channeled into the post-editing A/U-tailing reaction<sup>15</sup>.

232

### 233 ***KPAF4 inhibits mRNA uridylation in vivo***

234 In pre-edited mRNA, the mature 3' end is produced by MPsome-catalyzed trimming and  
235 KPAF3-stimulated adenylation<sup>7</sup>. The short A-tailed mRNA is then somehow protected from 3'-5'  
236 degradation during editing, and from KPAF1/2-stimulated A/U-tailing<sup>15</sup> until the editing process  
237 is completed<sup>8</sup>. Although conventional cloning and sequencing provided preliminary indication  
238 that KPAF4 may inhibit uridylation of short A-tailed mRNA (Fig. 4b), this technique's  
239 limitations prevented analysis of longer A-rich extensions. To obtain a comprehensive view of  
240 mRNA 3' termini in a KPAF4 RNAi background, we combined mRNA circularization with  
241 single molecule real time sequencing (SMRT, PacBio platform) and deep sequencing-by-  
242 synthesis (Illumina platform) to characterize short and long tails in pre-edited, edited and  
243 unedited mRNAs, and ribosomal RNAs (Supplementary Fig. 2). RNAs expected have only short  
244 tails, such as pre-edited RPS12, A6 and CYB transcripts, we sequenced on Illumina platform  
245 while their edited forms known to have both short and long tails were sequenced with PacBio  
246 platform<sup>34</sup>. Unedited CO1 mRNA, expected to have short and long tails, and U-tailed rRNA  
247 were sequenced on both platforms. The long-range SMRT sequencing of A/U-tails revealed an

248 approximately 50:50 A/U ratio in edited and unedited mRNAs (Fig. 5D, which is somewhat  
249 different than previously calculated 70:30 ratio<sup>15</sup>. The molecular cloning of 3' extensions in the  
250 original report likely caused the observed differences with this study. Length classification of  
251 short 3' extensions into 10 nt bins (Fig. 5a), and long ones into 10 nt and 50 nt bins (Fig. 5b),  
252 exposed higher heterogeneity and general shortening of short A-tails in pre-edited transcripts  
253 upon KPAF4 RNAi induction for 72 hours. In contrast, corresponding pan-edited RPS12 and A6  
254 mRNAs, and unedited CO1, possessed a higher percentage of tails in the 150-250 nt range,  
255 which encompasses the bulk of A/U-tailed mRNAs. The lack of effect on ribosomal RNAs  
256 further establishes KPAF4 as an mRNA-specific factor. We also noticed that the A/U-tail length  
257 distribution derived from real-time PacBio sequencing was consistent with the apparent length  
258 determined by northern blotting (Fig. 4a), as sequences longer than 400 nt were detected (Fig.  
259 5d). Plotting of nucleotide frequencies from short range sequencing also confirmed A-tail  
260 shortening accompanied by uridylation in pre-edited RPS12 and A6 mRNAs (Fig. 5c). As  
261 indicated by distribution of adenosine and uridine residues in long tails, lack of KPAF4 leads to  
262 earlier emergence of U-rich structures (Fig. 5d). Noteworthy, the high-fidelity short-range  
263 Illumina sequencing confirmed rRNA's uridylated status, while the real-time PacBio platform  
264 was uninformative for short 3' extensions. In conclusion, 3' tail sequencing on two independent  
265 platforms connected the loss of KPAF4 with the spurious addition of U-tails to adenylated  
266 mRNAs, and with general stimulation of A/U-tail synthesis.

267

### 268 ***KPAF4 binds A-tails in vivo***

269 To establish KPAF4 *in vivo* binding specificity, we applied UV-crosslinking of live cells, and  
270 two-step affinity purification of TAP-6His-tagged polypeptide followed by deep sequencing

271 (CLAP-Seq, Fig. 6a). We note that maxicircle genes encode rRNAs, and unedited and pre-edited  
272 mRNAs, which are typically separated by short non-coding regions. Since most genes are  
273 transcribed from dedicated promoters as 3' extended precursors, the mature mRNA 3' ends  
274 produced by 3'-5' trimming often extend into 5' regions of downstream genes<sup>4</sup>. In KPAF4  
275 CLAP-Seq,  $\sim 40 \times 10^6$  reads originated from maxicircle transcripts and edited mRNAs, while only  
276  $\sim 9 \times 10^6$  reads mapped to the minicircles constituting more than 90% of kinetoplast DNA<sup>35,36</sup>.  
277 Mapping of CLAP-Seq reads to the maxicircle revealed a preference for 3' ends of pre-edited  
278 and unedited transcripts encoded on both DNA strands. Conversely, most reads derived from  
279 abundant ribosomal RNAs clustered within 9S rRNA (Fig. 6b). At the mRNA level, plotting a  
280 nucleotide frequency within reads that partially mapped to unedited and edited transcripts  
281 demonstrated a strong bias toward adenosine residues at the 3' region (Fig. 6c). A composite read  
282 mapping and nucleotide frequency plot calculated for unedited and fully-edited mRNAs with the  
283 termination codon set as zero further demonstrates KPAF4's preferential binding near  
284 polyadenylation sites and to short A-tails, but not long A/U-tails (Fig. 6d). Interestingly, pure A-  
285 tracks accounted for approximately 0.5% ( $2 \times 10^5$ ) of all unmapped KPAF4-CLAP reads while  
286 sequences ending with more than 30 As constituted 33% ( $1.5 \times 10^6$ ) of all reads mapped to  
287 mitochondrial mRNAs. Mapping statistics for tail sequencing and KPAF4-CLAP are provided in  
288 Supplementary Table 4.

289 To test whether *in vivo* oligo(A) binding specificity is conferred by amino acid residues  
290 occupying positions 5 and 35 or the last residue in KPAF4 repeats, we introduced T5N and  
291 N35/36D substitutions into all seven PPRs (Fig. 1a). The expression levels of mutated variant  
292 (KPAF4-Mut) and KPAF4-WT were virtually identical (Supplementary Fig. 3a) and produced  
293 negligible growth phenotype (Supplementary Fig. 3b) while LC-MS/MS analysis demonstrated a

294 similar composition of respective affinity purified samples (Supplementary Table 5). However,  
295 in CLAP-Seq experiments KPAF4-Mut showed markedly reduced crosslinking efficiency  
296 (Supplementary Fig. 3c) and low background coverage of mitochondrial transcripts  
297 (Supplementary Fig. 3d).

298 KPAF4 knockdown leads to uridylation and upregulation of pre-edited mRNA, but also  
299 causes concurrent decay of the A-tailed edited form (Fig. 4a, b and e). To elucidate the  
300 connection between the mRNA's editing status and KPAF4-dependent stabilization, we  
301 compared read coverage between individual pre-edited and fully-edited mRNAs; nucleotide  
302 frequencies were also included to detect non-encoded 3' additions (Fig. 6e). A consistent pattern  
303 in pan-edited RPS12 and A6 mRNA showed that KPAF4 preferentially binds to the 5' and 3'  
304 regions, including A-tails, in pre-edited transcripts, but is confined to 3' regions in fully-edited  
305 mRNAs. In moderately-edited CYB mRNA, the editing-dependent re-distribution of reads was  
306 similar, except for adenosine enrichment at the pre-edited 5' end, a likely outcome of reads  
307 mapping to the 3' end of the closely-spaced upstream CO3 mRNA. These observations suggest  
308 that KPAF4 binds to both 5' and 3' termini in pre-edited transcripts, possibly leading to mRNA  
309 circularization. Furthermore, sequence changes introduced by editing and/or remodeling of  
310 ribonucleoprotein complexes during the editing process, apparently displace KPAF4 from 5'  
311 regions, where the editing process comes to completion. The circularization suggested by  
312 KPAF4 binding to both mRNA ends (Fig. 6e) and cross-talk between 3' end-bound KPAF4 and  
313 5' end-bound PPsome (Fig. 2) may be critical for inhibiting 3'-5' degradation<sup>7</sup>. These  
314 observations may provide a mechanistic basis for the rapid decay of edited mRNA in MERS1  
315 knockdown<sup>12</sup>. MERS1 pyrophosphohydrolase binds to the 5' terminus and removes  
316 pyrophosphate from the first nucleotide incorporated by transcription, but the mechanism of

317 mRNA stabilization by MERS1 remains unclear<sup>4</sup>. If circularization indeed takes place, we  
318 reasoned that MERS1 would also be expected to bind the 3' end and/or A-tails. Mapping of  
319 MERS1-CLAP reads to the same transcripts exposed the KPAF4-like re-distribution of MERS1  
320 binding sites from the 5' end in pre-edited to both 5' and 3' termini including A-tails in edited  
321 mRNAs (Fig. 6f). In sum, *in vivo* crosslinking experiments indicate that pan-editing events  
322 eliminate KPAF4 binding sites in pre-edited transcripts and confine this factor to the 3' region  
323 and short A-tail. These events are likely responsible for KPAF4-mediated protection of A-tailed  
324 edited mRNA against 3'-5' degradation by the mitochondrial processome.

325

### 326 **KPAF4 inhibits uridylation and degradation of adenylated RNAs *in vitro***

327 Recombinant KPAP1 poly(A) polymerase activity is intrinsically limited to adding 20-25  
328 adenosines<sup>8</sup>, while RET1 TUTase processively polymerizes hundreds of uridines *in vitro*<sup>26</sup>.  
329 Although both enzymes lack a pronounced RNA specificity, RET1 is most efficient on substrates  
330 terminating with several Us<sup>16</sup>. Likewise, uridylated RNAs represent the preferred substrate for  
331 the MPsome *in vivo* and *in vitro*<sup>6</sup>. It follows that a factor responsible for blocking uridylation and  
332 stabilization of adenylated mRNA would specifically bind A-tailed RNA and interfere with  
333 RET1 and MPsome activities. To investigate whether KPAF4 possesses such properties, we have  
334 established an *in vitro* reconstitution system composed of affinity purified KPAF4 and DSS1  
335 exonuclease complexes, and recombinant KPAP1 and RET1 enzymes. We used synthetic 81 nt  
336 RNA resembling a 3' region of edited RPS12 mRNA, and RNAs extended with either 20 As or  
337 20 Us, in parallel experiments with purified KPAF4-WT and KPAF4-Mut (Fig. 7a and  
338 Supplementary Table 5).



339 In an electrophoretic mobility shift assay (EMSA), only adenylated RNA formed a single  
340 distinct ribonucleoprotein complex commensurate with increasing KPAF4-WT concentration  
341 (Fig. 7b). Conversely, KPAF4-Mut failed to bind any of the substrates within the protein  
342 concentration range afforded by the assay (Fig. 7c). In enzymatic reactions with no-tail RNA,  
343 RET1 and KPAP1 produced patterns like those reported for generic RNA substrates: distributive  
344 addition of ~15 As and processive polymerization of hundreds of Us, respectively (Fig. 7d,<sup>8,37</sup>).  
345 In reactions containing a mixture of both enzymes, the extension patterns were dominated by  
346 RET1 activity. Uridylated RNA was efficiently utilized by RET1 but proved to be a poor  
347 substrate for KPAP1. In contrast to no-tail and U-tailed RNA, KPAP1 inhibited processive  
348 uridylation of the A-tailed substrate by RET1 TUTase. Unlike KPAF3, which dramatically  
349 stimulates KPAP1 activity on any tested RNA<sup>7</sup>, KPAF4 did not produce noticeable effects on  
350 either RET1 or KPAP1 activities with no-tail or U-tail RNA. However, KPAF4 inhibited  
351 processive uridylation of A-tailed RNA by RET1 TUTase, and this effect was further enhanced  
352 by KPAP1. Together, these results demonstrate that KPAF4 specifically recognizes adenylated  
353 RNAs and inhibits their uridylation by RET1 TUTase. Importantly, KPAF4's inhibitory effect on  
354 uridylation is enhanced by KPAP1 poly(A) polymerase.

355 The MPsome-catalyzed 3'-5' degradation represents a major processing pathway for  
356 rRNA, mRNA, and gRNA precursors, and is also responsible for decay of mature molecules<sup>6,7</sup>.  
357 While KPAF3 has been shown to protect any RNA against degradation by the MPsome *in vitro*<sup>7</sup>,  
358 KPAF4 binding properties and knockdown outcomes suggest that it may preferentially inhibit  
359 degradation of adenylated RNAs. To test this hypothesis, we reconstituted mRNA degradation  
360 with affinity-purified MPsome and the same 5' radiolabeled substrates used in binding and 3'  
361 extension assays. Reactions were performed for a fixed duration in the presence of increasing

362 KPAF4 concentrations (Fig. 7e, left panels), or a time course was followed in the presence of a  
363 constant KPAF4 amount (Fig. 7e, right panels). Quantitation of KPAF4 concentration- or time-  
364 dependent decrease of input substrate demonstrated that the MPsome degrades no-tail or  
365 uridylated RNAs irrespective of KPAF4 presence. However, KPAF4 specifically inhibits  
366 hydrolysis of adenylated RNA by the MPsome (Supplementary Fig. 4). These experiments  
367 illustrate that KPAF4 *in vitro* properties are consistent with the expected functions of a poly(A)  
368 binding protein in: 1) Recognizing the A-tail; 2) Protecting adenylated mRNA against premature  
369 uridylation by RET1 TUTase; and 3) Inhibiting degradation of adenylated mRNA by the  
370 MPsome.

371

372

## 373 **Discussion**

374 Extensive studies of the unicellular parasite *Trypanosoma brucei* revealed physical interactions  
375 and functional coupling between protein complexes that convert cryptic mitochondrial transcripts  
376 into translation-competent mRNAs. Among many transformations, constrained adenylation by  
377 KPAP1 poly(A) polymerase is critical for edited and unedited mRNA stability<sup>8,13</sup>. Addition of  
378 20-25 adenosines is stimulated by KPAF3 polyadenylation factor, which is recruited to pre-  
379 edited mRNA, but is then displaced by editing events<sup>7</sup>. Thus, transcripts edited beyond a few  
380 initial sites depend on the short A-tail for protection against destruction by the mitochondrial  
381 processome. Although 3'-5' exonucleolytic degradation is the main decay mechanism, mRNA  
382 stabilization also requires binding of PPsome subunit MERS1 to the 5' end. Finally, post-editing  
383 A/U-tailing involving RET1 TUTase activates ribosome recruitment and translation, but this  
384 reaction is somehow blocked during the editing process to avoid synthesis of aberrant proteins  
385 from mRNA lacking an open reading frame<sup>15</sup>. To reconcile these observations, we envisaged that  
386 a *trans*-acting factor may recognize a nascent A-tail to enable an interaction between protein  
387 complexes occupying 5' and 3' mRNA termini. Consequentially, this would increase resistance  
388 to degradation and uridylation. In this study, we identified the pentatricopeptide repeat-  
389 containing factor KPAF4 as essential for normal parasite growth and demonstrated its role in  
390 recognizing 3' A-tails, preventing mRNA uridylation by RET1, and inhibiting 3'-5' degradation  
391 of adenylated mRNAs by the MPsome.

392 PPR proteins are defined by arrays of approximately 35-amino acid helix-turn-helix  
393 motifs<sup>38</sup>, each recognizing a single nucleotide via amino acid side chains occupying cardinal  
394 positions 5 and 35<sup>17</sup>. Bioinformatic analysis of trypanosomal PPRs identified KPAF4 as a factor  
395 potentially capable of binding five consecutive adenosines, and, therefore, a candidate for a

396 mitochondrial poly(A) binding protein. Biochemical fractionation, immunochemical and  
397 proteomics experiments demonstrate that KPAF4 interacts with polyadenylation and RNA  
398 editing substrate binding (RESC) complexes. In agreement with an established architecture of  
399 the RESC, KPAF4 contacts are mostly confined to the polyadenylation mediator module  
400 (PAMC), which has been defined as a docking site for the polyadenylation complex<sup>25</sup>. A binding  
401 platform for RNA editing substrates and products<sup>3,39</sup>, RESC also recruits enzymatic RNA editing  
402 core complex and, importantly for mRNA stabilization, the 5' end-bound PPsome<sup>4</sup>. Therefore, it  
403 seems plausible that RESC-mediated interaction network provides a physical basis for functional  
404 coupling among 5' pyrophosphate removal by MERS1, KPAP1-catalyzed 3' adenylation, and  
405 internal U-insertion/deletion editing. To that end, *in vivo* crosslinking identified 3' termini and  
406 short A-tails as KPAF4 primary recognition sites, but also detected binding events in the 5'  
407 region. KPAF4 CLAP-Seq coverage displayed an instructive correlation with the editing status:  
408 The 3' termini including A-tails were occupied in all tested mRNA types (pre-edited, edited and  
409 unedited), while the 5' regions were bound chiefly in pre-edited mRNAs. Remarkably, these  
410 patterns were mirrored by editing-dependent re-distribution of MERS1 binding sites.  
411 Collectively, interaction networks, proximity studies, and identification of *in vivo* binding sites  
412 point toward circularization as the major mRNA surveillance and stabilization event. In this  
413 scenario, only adenylated pre-mRNA proceeds through the editing pathway while being  
414 protected by KPAF4-bound short A-tail from an assault by the MPsome, which degrades RNA<sup>7</sup>,  
415 and from A/U-tailing, which activates translation<sup>15</sup>.

416         Although circularization is likely to take place *in vivo*, KPAF4 *in vitro* properties are also  
417 consistent with short A-tail-dependent inhibition of 3'-5' degradation by the MPsome and 3'  
418 uridylation by RET1 TUTase. Accordingly, the outcomes of KPAF4 knockdown revealed

419 specific loss of A-tailed molecules, but minimal impact on post-editing A/U-tailing reaction,  
420 which is accomplished by KPAP1, RET1 and KPAF1/2 polyadenylation factors. It seems likely  
421 that the A/U-tailed mRNA no longer depends on KPAF4-mediated stabilization mechanism. The  
422 argument can be extended to suggest that completion of editing results in KPAF4 displacement  
423 from the short A-tail and/or loss of interaction with the 5' end. These events would enable RET1  
424 access and trigger A/U-tailing. The presence of a protein “sensor” monitoring RNA editing  
425 completion has been suggested<sup>20</sup>, but further studies are required to decipher a signaling  
426 mechanism. The KPAF4 stabilizing role is somewhat similar to PPR10 in maize chloroplasts,  
427 which defines mRNA 3' end by binding to a specific site and impeding 3'-5' degradation<sup>40</sup>. The  
428 distinction in lies in post-trimming addition of the KPAP4 binding platform.

429         In this example of convergent evolution, a PPR array in KPAF4 apparently carries a  
430 similar function to that of an RRM domain, a universal fold of canonical poly(A) binding  
431 proteins<sup>41</sup>. Although the recognition mechanisms are likely to be different, KPAF4 properties are  
432 well aligned with a paradigm for PPR repeats as sequence-specific readers and modulators of  
433 diverse enzymatic activities. The latter effects can be stimulatory, as typified by KPAF1/2<sup>15</sup> and  
434 KPAF3<sup>7</sup>, or inhibitory, like those conferred by KPAF4.

435

## 436 **Methods**

### 437 ***Parasite maintenance, RNAi, protein expression and RNA analysis***

438 Plasmids for RNAi knockdowns were generated by cloning an ~500-bp gene fragment into  
439 p2T7-177 vector for tetracycline-inducible expression<sup>42</sup>. Linearized constructs were transfected  
440 into a procyclic 29-13 *T. brucei* strain<sup>22</sup>. For inducible protein expression, full-length genes were  
441 cloned into pLew-MHTAP vector<sup>43</sup>. For BioID experiments, full-length genes were cloned into  
442 the same vector with the C-terminal TAP tag replaced by a mutated BirA\* ligase from *E. coli*<sup>32</sup>.

### 443 ***Biochemical analysis***

444 RNAi, mitochondrial isolation, glycerol gradient, native gel, total RNA isolation, northern and  
445 western blotting, qRT-PCR, and tandem affinity purification were performed as described in<sup>44</sup>.  
446 The change in relative abundance was calculated based on qRT-PCR, or northern blotting, data  
447 assuming the ratio between analyzed transcripts and control RNAs in mock-induced cells as 1 or  
448 100%, respectively. BioID purifications were performed from crude mitochondrial fractions, as  
449 described in the Appendix.

### 450 ***Protein identification by LC-MS/MS***

451 Affinity-purified complexes were sequentially digested with LysC peptidase and trypsin. LC-  
452 MS/MS was carried out by nanoflow reversed phase liquid chromatography (RPLC) (Eksigent,  
453 CA) coupled on-line to a Linear Ion Trap (LTQ)-Orbitrap mass spectrometer (Thermo-Electron  
454 Corp). A cycle of full FT scan mass spectrum ( $m/z$  350-1800, resolution of 60,000 at  $m/z$  400) was  
455 followed by 10 MS/MS spectra acquired in the linear ion trap with normalized collision energy  
456 (setting of 35%). Following automated data extraction, resultant peak lists for each LC-MS/MS  
457 experiment were submitted to Protein Prospector (UCSF) for database searching similarly as

458 described<sup>45</sup>. Each project was searched against a normal form concatenated with the random form  
459 of the *T. brucei* database (<http://tritrypdb.org/tritrypdb/>).

#### 460 ***Sequencing of RNA 3' extensions***

461 Total RNA (10 µg) was circularized with T4 RNA ligase 1<sup>8</sup>, digested with RNase R (Epicenter)  
462 to remove linear RNA, and termini were amplified with gene-specific primers listed in  
463 Supplementary Information. Two biological replicates of long range Single Molecule Real-Time  
464 (SMRT) sequencing of 0.2-4 kb fragments was performed on a PacBio RS II system (Pacific  
465 Biosciences). Highly similar data sets (Pearson correlation coefficient 0.89) were combined for  
466 final analysis. A single round of short range sequencing was performed on a MiSeq instrument in  
467 300 nt mode.

#### 468 ***Crosslinking-affinity purification and sequencing (CLAP-Seq)***

469 UV-crosslinking, affinity purification and RNA-Seq library preparation from KPAF4- and  
470 MERS1-bound RNA fragments have been performed as described<sup>44</sup>, with modifications and  
471 details of bioinformatics analysis outlined in the Appendix.

#### 472 ***In vitro reconstitution***

473 Edited RPS12 mRNA fragments were prepared by *in vitro* transcription and 5' radiolabeled.

474 No-tail: GGGTGGTGGTTTTGTTGATTTACCCGGTGTAAGTATTATACACGTATTGU

475 AAGUUAGAUUUAGAUUAAGAU AUGUUUUU

476 A-tail: GGGTGGTGGTTTTGTTGATTTACCCGGTGTAAGTATTATACACGTATT

477 GUAAGUUAGAUUUAGAUUAAGAU AUGUUUUUAAAAAAAAAAAAAAAAAAAAA





496 **Acknowledgments**

497 We thank members of our laboratories and Ruslan Aphasizhev for discussions and technical  
498 advice. This research was supported by NIH grant AI113157 to I.A.

499

500 **Author contributions**

501 M.M., T.S., C.Y. and I.A. carried out the experiments and contributed to discussion. T.Y., L.Z.  
502 and L.H. analyzed data, and developed analytical tools and contributed to discussion. I.A.  
503 designed experiments and wrote the paper. I.A. serves as the guarantor.

504

505 **Figure legends**

506

507 **Fig. 1 Repeat organization, subcellular localization and complex association of KPAF4.**

508 **(a)** Schematic repeat organization of Kinetoplast Polyadenylation Factor 4 from *Trypanosoma*  
509 *brucei* (Tb) and *Leishmania infantum* (Li). Repeat boundaries were determined using the  
510 TPRpred online tool (<https://toolkit.tuebingen.mpg.de/#/tools/tpred>) and adjusted  
511 according to Cheng et al<sup>17</sup>. Amino acids in positions 5 and 35/last potentially involved in  
512 adenosine recognition are indicated in separate columns.

513 **(b)** Mitochondrial targeting of KPAF4-TAP fusion protein. Crude mitochondrial fraction was  
514 isolated by hypotonic lysis and differential centrifugation (crude mito), and further purified  
515 by Renografin density gradient (pure mito). The latter preparation was extracted under  
516 conditions that separate matrix from membrane-bound proteins<sup>44</sup>. Protein profiles were  
517 visualized by Sypro Ruby staining and KPAF4-TAP was detected with an antibody against  
518 the calmodulin binding peptide. The mitochondrial enrichment was calculated by  
519 quantitative western blotting vs. total protein loading.

520 **(c)** Tandem affinity purification of KPAF4. Final fraction was separated on 8-16% SDS gel and  
521 stained with Sypro Ruby.

522 **(d)** KPAF4 co-purification with mRNA processing complexes. Fractions purified from parental  
523 cell line (beads, no tagged protein expressed), and mock and RNase-treated mitochondrial  
524 extracts were subjected to immunoblotting with antibodies against MERS1 NUDIX  
525 hydrolase (PPsome subunit), KPAP1 poly(A) polymerase, KPAF1 and KPAF3  
526 polyadenylation factors, and GRBC1/2 (RNA editing substrate binding complex, RESC) and

527 RET1 TUTase (MPsome). Tagged KPAF4 was detected with antibody against calmodulin  
528 binding peptide. RNA editing core complex (RECC) was detected by self-adenylation of  
529 REL1 and REL2 RNA ligases in the presence of [ $\alpha$ - $^{32}$ P]ATP.

530 (e) Crude mitochondrial fraction was extracted with detergent and soluble contents were  
531 separated for 5 hours at 178,000 g in a 10-30% glycerol gradient. Each fraction was resolved  
532 on 3-12% Bis-Tris native gel. Positions of native protein standards are denoted by arrows.  
533 KPAP1, KPAF4-TAP, MERS1 and GRBC1/2 were visualized by immunoblotting. REL1  
534 and REL2 RNA ligases were detected by self-adenylation. Thyroglobulin (19S) and bacterial  
535 ribosomal subunits were used as apparent S-value standards.

536

537 **Fig. 2 KPAF4 interactions and proximity networks.**

538 (a) Model of the interactions between KPAF4, KPAP1 poly(A) polymerase, KPAF1-2 and  
539 KPAF3 polyadenylation factors, RNA editing substrate binding complex (RESC), and  
540 MRP1/2 RNA chaperones. KPAP1, KPAF1, KPAF2, KPAF3, KPAF4, MRP2, MERS1 and  
541 Tb927.3.2670 proteins (encircled in red) were affinity purified from mitochondrial lysates.  
542 The network was generated in Cytoscape software from bait-prey pairs in which the prey  
543 protein was identified by five or more unique peptides. The edge thickness correlates with  
544 normalized spectral abundance factor (NSAF) values ranging from  $2.9 \times 10^{-3}$  to  $4.4 \times 10^{-5}$   
545 (Supplementary Table 1). Edges between tightly bound RESC modules (GRBC, REMC and  
546 PAMC) were omitted for clarity<sup>25</sup>. All purifications were performed in parallel under  
547 uniform conditions.

548 (b) KPAF4 proximity network. Spectral counts derived from BioID experiments with KPAP1,  
549 KPAF4, GRBC2 and MERS1 fusions with BirA\* biotin ligase were processed as in (A) to

550 build a proximity network. The edge thickness correlates with normalized spectral abundance  
551 factor (NSAF) values ranging from  $2.9 \times 10^{-3}$  to  $2.6 \times 10^{-5}$  (Supplementary Table 2). All  
552 purifications were performed in parallel under uniform conditions.

553

554 **Fig. 3. KPAF4 repression effects on cell growth and polyadenylation complex.**

555 (a) Northern blotting analysis of KPAF4 mRNA downregulation by inducible RNAi.

556 (b) Growth kinetics of procyclic parasite cultures after mock treatment and KPAF4 RNAi  
557 induction with tetracycline.

558 (c) Quantitative real-time RT-PCR analysis of RNAi-targeted KPAF4 mRNA, and  
559 mitochondrial rRNAs and mRNAs. The assay distinguishes edited and corresponding pre-  
560 edited transcripts, and unedited mRNAs. RNA levels were normalized to  $\beta$ -tubulin mRNA.  
561 RNAi was induced for 55 hours. Error bars represent the standard deviation from at least  
562 three biological replicates. The thick line at “1” reflects no change in relative abundance;  
563 bars above or below represent an increase or decrease, respectively. P, pre-edited mRNA; E,  
564 edited mRNA.

565 (d) Cell lysates prepared at indicated time points of KPAF4 RNAi induction were sequentially  
566 probed by quantitative immunoblotting with antigen-purified antibodies against KPAP1,  
567 KPAF1, KPAF3, GRBC1/2, and monoclonal antibodies against RET1 TUTase. Samples  
568 were normalized by protein loading.

569

570 **Fig. 4 Divergent effects of KPAF4 knockdown on mitochondrial RNAs.**

571 (a) Northern blotting of pre-edited (Pre-E), partially-edited (Part-E), and fully-edited RPS12  
572 mRNA variants. Total RNA was separated on a 5% polyacrylamide/8M urea gel and

573 sequentially hybridized with radiolabeled single-stranded DNA probes. Zero-time point:  
574 mock-induced RNAi cell line. Cytosolic 5.8S rRNA was used as loading control. Parent,  
575 RNA from parental 29-13 cell line; (dT), RNA was hybridized with 20-mer oligo(dT) and  
576 treated with RNase H to show positions of non-adenylated molecules in parental cell line.  
577 Pre-edited RNA length increase in KPAF4 RNAi is shown by brackets.

578 **(b)** Alignment of representative RPS12 mRNA 3' ends in KPAF4 RNAi cells. RNA termini were  
579 amplified by cRT-PCR, cloned and sequenced<sup>8</sup>. A fragment of 3' untranslated region, short  
580 A-tail and U-extensions are indicated.

581 **(c)** Northern blotting of pan-edited A6 mRNA. Total RNA was separated on a 1.7%  
582 agarose/formaldehyde gel and sequentially hybridized with oligonucleotide probes for pre-  
583 edited and fully-edited sequences. Loading control: cytosolic 18S rRNA.

584 **(d)** Northern blotting of moderately-edited *cyb* mRNA. Total RNA was separated on a 1.7%  
585 agarose/formaldehyde gel and hybridized with oligonucleotide probes for pre-edited and  
586 fully-edited sequences. Loading control: cytosolic 18S rRNA.

587 **(e)** Northern blotting of unedited CO1 and ND1 mRNAs. Total RNA was separated on a 1.7%  
588 agarose/formaldehyde gel and sequentially hybridized with oligonucleotide probes. Loading  
589 control: cytosolic 18S rRNA.

590 **(f)** Northern blotting of mitochondrial ribosomal RNAs. Total RNA was separated on a 5%  
591 polyacrylamide/8M urea gels and hybridized with oligonucleotide probes. Loading control:  
592 cytosolic 5.8S rRNA.

593 **(g)** Guide RNA northern blotting. Total RNA was separated on a 10% polyacrylamide/8M urea  
594 gel and hybridized with oligonucleotide probes specific for gA6(14) and gCO3(147).  
595 Mitochondrially-localized tRNA<sup>Cys</sup> served as loading control.

596

597 **Fig. 5 Sequencing of mRNA and rRNA 3' extensions in KPAF4 RNAi background.**

598 **(a)** Length distribution of short mRNA and 12S rRNA tails. Non-encoded 3' end extensions  
599 (MiSeq instrument, Illumina, single biological replicate) were individually binned into 10-nt  
600 length groups. Mock-induced and RNAi datasets, indicated by blue and red bars,  
601 respectively, represent percentage of the total number of reads.

602 **(b)** Length distribution of long mRNA and 12S rRNA tails. Non-encoded 3' end extensions  
603 (PacBio RS II instrument, two biological replicates) were individually binned into 10-nt  
604 length groups before 100 nt, and in 50-nt groups thereafter. Mock-induced and RNAi  
605 datasets are indicated by blue and red bars, respectively, that represent percentage of the total  
606 number of reads.

607 **(c)** Positional nucleotide frequencies in short mRNAs and 12S rRNA tails. A nucleotide  
608 percentage was calculated for each position that contained at least 5% of the total extracted  
609 sequences. The nucleotide bases are color-coded as indicated.

610 **(d)** Positional nucleotide frequencies in long mRNA and 12S rRNA tails. A nucleotide  
611 percentage was calculated for each position that contained at least 5% of the total extracted  
612 sequences. The nucleotide bases are color-coded as indicated.

613

614 **Fig. 6 Distribution of KPAF4 *in vivo* binding sites between pre-edited and edited mRNAs.**

615 **(a)** Isolation of *in vivo* KPAF4-RNA crosslinks. Modified TAP-tagged fusion protein was  
616 purified by tandem affinity pulldown from UV-irradiated (+) or mock-treated (-) parasites.  
617 The second purification step was performed under fully-denaturing conditions and resultant  
618 fractions were subjected to partial on-beads RNase I digestion and radiolabeling. Upon

619 separation on SDS PAGE, RNA-protein crosslinks were transferred onto nitrocellulose  
620 membrane. Protein patterns were visualized by Sypro Ruby staining (left panel), and RNA-  
621 protein crosslinks were detected by exposure to phosphor storage screen (right panel). RNA  
622 from areas indicated by brackets was sequenced. Representative of three biological replicates  
623 is shown.

624 **(b)** KPAF4 *in vivo* binding sites. Crosslinked fragments were mapped to the maxicircle's gene-  
625 containing region. Annotated mitochondrial transcripts encoded on major and minor strands  
626 are indicated by blue and red arrows, respectively.

627 **(c)** Position-specific nucleotide frequency in partially mapped KPAF4 CLAP-Seq reads. In reads  
628 selected by partial mapping to maxicircle and edited mRNAs, the unmapped 3' segments  
629 were considered as tail sequences. The nucleotide frequency was calculated for each position  
630 beginning from the 3' end.

631 **(d)** Aggregate KPAF4 mRNA binding pattern. Read coverage is represented by the grey area,  
632 and the nucleotides in 3' extensions are color-coded at their projected positions.

633 **(e)** KPAF4 binding to representative pan-edited (RPS12, A6) and moderately edited (CYB)  
634 mRNAs. Read coverage profiles were created for matching pre-edited and fully edited  
635 mRNA. Read coverage is represented by the grey area, and the unmapped nucleotides in 3'  
636 extensions are color-coded at their projected positions. The mRNA is highlighted with a rose  
637 bar in the context of adjacent maxicircle sequences.

638 **(f)** MERS1 binding to representative pan-edited (RPS12, A6), and moderately edited (CYB)  
639 mRNAs. Graphs were created as in panel (E).

640

641 **Fig. 7 KPAF4-bound adenylated RNA is partially resistant to uridylation and degradation**

642 *in vitro.*

643 **(a)** Western blotting of affinity purified KPAF4-WT and KPAF4-Mut samples. Protein samples  
644 were purified from mitochondrial fraction by rapid affinity pulldown with IgG-coated  
645 magnetic beads. KPAF4 polypeptides were detected with an antibody against the calmodulin  
646 binding peptide.

647 **(b)** Electrophoretic mobility shift assay with KPAF4-WT. Increasing amounts of affinity-  
648 purified KPAF4 were incubated with 5' radiolabeled RNAs and separated on 3-12% native  
649 PAGE.

650 **(c)** Electrophoretic mobility shift assay with KPAF4-Mut was performed as in (b).

651 **(d)** RNA adenylation and uridylation. KPAP1, RET1, or in combination, were incubated with 5'  
652 radiolabeled RNA and ATP, UTP, or ATP/UTP mix, respectively, in the absence or presence  
653 of KPAF4. Recombinant enzymes were purified from bacteria as described<sup>8,46</sup>. Reactions  
654 were terminated at indicated time intervals and products were resolved on 10%  
655 polyacrylamide/ 8M urea gel.

656 **(e)** RNA degradation. The same RNA substrates as in (d) were incubated with increasing (left  
657 panels) or constant (right panels) concentrations of KPAF4 in the presence or absence of the  
658 MPsome. Reactions were terminated at indicated time intervals and products were resolved  
659 on a 10% polyacrylamide/ 8M urea gel. Input RNA and final degradation products of 4-5 nt  
660 (FP) are shown.

661



## References

1. Aphasizhev, R. & Aphasizheva, I. Mitochondrial RNA Processing In Trypanosomes. *Research in Microbiology* **162**, 655-663 (2011).
2. Aphasizhev, R. & Aphasizheva, I. Mitochondrial RNA editing in trypanosomes: Small RNAs in control. *Biochimie* **100**, 125-131 (2014).
3. Read, L.K., Lukes, J. & Hashimi, H. Trypanosome RNA editing: the complexity of getting U in and taking U out. *Wiley Interdiscip Rev RNA* **7**, 33-51 (2016).
4. Sement FM, S.T., Zhang L, Yu T, Huang L, Aphasizheva I, Aphasizhev R. Transcription initiation defines kinetoplast RNA boundaries. *BioRxiv MS ID#: BIORXIV/2018/350256*(2018).
5. Mattiaccio, J.L. & Read, L.K. Roles for TbDSS-1 in RNA surveillance and decay of maturation by-products from the 12S rRNA locus. *Nucleic Acids Res* **36**, 319-329 (2008).
6. Suematsu, T. et al. Antisense Transcripts Delimit Exonucleolytic Activity of the Mitochondrial 3' Processome to Generate Guide RNAs. *Mol Cell* **61**, 364-78 (2016).
7. Zhang, L. et al. PPR polyadenylation factor defines mitochondrial mRNA identity and stability in trypanosomes. *EMBO J* **36**, 2435-2454 (2017).
8. Etheridge, R.D., Aphasizheva, I., Gershon, P.D. & Aphasizhev, R. 3' adenylation determines mRNA abundance and monitors completion of RNA editing in *T. brucei* mitochondria. *EMBO J* **27**, 1596-1608 (2008).
9. Adler, B.K., Harris, M.E., Bertrand, K.I. & Hajduk, S.L. Modification of *Trypanosoma brucei* mitochondrial rRNA by posttranscriptional 3' polyuridine tail formation. *Mol. Cell. Biol* **11**, 5878-5884 (1991).
10. Blum, B. & Simpson, L. Guide RNAs in kinetoplastid mitochondria have a nonencoded 3' oligo-(U) tail involved in recognition of the pre-edited region. *Cell* **62**, 391-397 (1990).
11. Aphasizheva, I. & Aphasizhev, R. RET1-catalyzed Uridylylation Shapes the Mitochondrial Transcriptome in *Trypanosoma brucei*. *Molecular and Cellular Biology* **30**, 1555-1567 (2010).
12. Weng, J. et al. Guide RNA-Binding Complex from Mitochondria of Trypanosomatids. *Molecular Cell* **32**, 198-209 (2008).
13. Kao, C.Y. & Read, L.K. Opposing effects of polyadenylation on the stability of edited and unedited mitochondrial RNAs in *Trypanosoma brucei*. *Mol. Cell Biol* **25**, 1634-1644 (2005).
14. Maslov, D.A. & Simpson, L. The polarity of editing within a multiple gRNA-mediated domain is due to formation of anchors for upstream gRNAs by downstream editing. *Cell* **70**, 459-467 (1992).
15. Aphasizheva, I., Maslov, D., Wang, X., Huang, L. & Aphasizhev, R. Pentatricopeptide Repeat Proteins Stimulate mRNA Adenylation/Uridylation to Activate Mitochondrial Translation in Trypanosomes. *Molecular Cell* **42**, 106-117 (2011).
16. Aphasizheva, I., Aphasizhev, R. & Simpson, L. RNA-editing terminal uridylyl transferase 1: identification of functional domains by mutational analysis. *J. Biol. Chem* **279**, 24123-24130 (2004).
17. Cheng, S. et al. Redefining the structural motifs that determine RNA binding and RNA editing by pentatricopeptide repeat proteins in land plants. *Plant J* **85**, 532-47 (2016).

18. Shen, C. et al. Structural basis for specific single-stranded RNA recognition by designer pentatricopeptide repeat proteins. *Nat Commun* **7**, 11285 (2016).
19. Coquille, S. et al. An artificial PPR scaffold for programmable RNA recognition. *Nat Commun* **5**, 5729 (2014).
20. Aphasizhev, R. & Aphasizheva, I. Emerging roles of PPR proteins in trypanosomes: Switches, blocks, and triggers. *RNA Biol* **10**, 1495-1500 (2013).
21. Puig, O. et al. The tandem affinity purification (TAP) method: a general procedure of protein complex purification. *Methods* **24**, 218-229 (2001).
22. Wirtz, E., Leal, S., Ochatt, C. & Cross, G.A. A tightly regulated inducible expression system for conditional gene knock-outs and dominant-negative genetics in *Trypanosoma brucei*. *Mol. Biochem. Parasitol* **99**, 89-101 (1999).
23. Aphasizhev, R. et al. Isolation of a U-insertion/deletion editing complex from *Leishmania tarentolae* mitochondria. *EMBO J* **22**, 913-924 (2003).
24. Schnauffer, A. et al. Separate Insertion and Deletion Subcomplexes of the *Trypanosoma brucei* RNA Editing Complex. *Mol Cell* **12**, 307-319 (2003).
25. Aphasizheva, I. et al. RNA binding and core complexes constitute the U-insertion/deletion editosome. *Mol. Cell Biol* **34**, 4329-4342 (2014).
26. Aphasizhev, R. et al. Trypanosome Mitochondrial 3' Terminal Uridylyl Transferase (TUTase): The Key Enzyme in U-insertion/deletion RNA Editing. *Cell* **108**, 637-648 (2002).
27. Neilson, K.A., Keighley, T., Pascovici, D., Cooke, B. & Haynes, P.A. Label-free quantitative shotgun proteomics using normalized spectral abundance factors. *Methods Mol Biol* **1002**, 205-22 (2013).
28. Koller, J. et al. *Trypanosoma brucei* gBP21. An arginine-rich mitochondrial protein that binds to guide RNA with high affinity. *J. Biol. Chem* **272**, 3749-3757 (1997).
29. Aphasizhev, R., Aphasizheva, I., Nelson, R.E. & Simpson, L. A 100-kD complex of two RNA-binding proteins from mitochondria of *Leishmania tarentolae* catalyzes RNA annealing and interacts with several RNA editing components. *RNA* **9**, 62-76 (2003).
30. Schumacher, M.A., Karamooz, E., Zikova, A., Trantirek, L. & Lukes, J. Crystal structures of *T. brucei* MRP1/MRP2 guide-RNA binding complex reveal RNA matchmaking mechanism. *Cell* **126**, 701-711 (2006).
31. Muller, U.F., Lambert, L. & Goringer, H.U. Annealing of RNA editing substrates facilitated by guide RNA-binding protein gBP21. *EMBO J* **20**, 1394-1404 (2001).
32. Roux, K.J., Kim, D.I., Raida, M. & Burke, B. A promiscuous biotin ligase fusion protein identifies proximal and interacting proteins in mammalian cells. *J Cell Biol* **196**, 801-10 (2012).
33. Kim, D.I. et al. Probing nuclear pore complex architecture with proximity-dependent biotinylation. *Proc Natl Acad Sci U S A* **111**, E2453-61 (2014).
34. Sharon, D., Tilgner, H., Grubert, F. & Snyder, M. A single-molecule long-read survey of the human transcriptome. *Nat Biotechnol* **31**, 1009-14 (2013).
35. Ochsenreiter, T., Cipriano, M. & Hajduk, S.L. KISS: the kinetoplastid RNA editing sequence search tool. *RNA* **13**, 1-4 (2007).
36. Hong, M. & Simpson, L. Genomic organization of *Trypanosoma brucei* kinetoplast DNA minicircles. *Protist* **154**, 265-279 (2003).

37. Rajappa-Titu, L. et al. RNA Editing TUTase 1: structural foundation of substrate recognition, complex interactions and drug targeting. *Nucleic Acids Res* **44**, 10862-10878 (2016).
38. Small, I.D. & Peeters, N. The PPR motif - a TPR-related motif prevalent in plant organellar proteins. *Trends Biochem Sci* **25**, 46-47 (2000).
39. Aphasizheva, I. & Aphasizhev, R. U-Insertion/Deletion mRNA-Editing Holoenzyme: Definition in Sight. *Trends Parasitol* **13**, 1078-1083 (2015).
40. Prikryl, J., Rojas, M., Schuster, G. & Barkan, A. Mechanism of RNA stabilization and translational activation by a pentatricopeptide repeat protein. *Proc. Natl. Acad. Sci. U. S. A* **108**, 415-420 (2010).
41. Goss, D.J. & Kleiman, F.E. Poly(A) binding proteins: are they all created equal? *Wiley Interdiscip Rev RNA* **4**, 167-79 (2013).
42. Wickstead, B., Ersfeld, K. & Gull, K. Targeting of a tetracycline-inducible expression system to the transcriptionally silent minichromosomes of *Trypanosoma brucei*. *Mol. Biochem. Parasitol* **125**, 211-216 (2002).
43. Jensen, B.C. et al. Characterization of protein kinase CK2 from *Trypanosoma brucei*. *Mol Biochem Parasitol* **151**, 28-40 (2007).
44. Aphasizheva, I., Zhang, L. & Aphasizhev, R. Investigating RNA editing factors from trypanosome mitochondria. *Methods* **107**, 23-33 (2016).
45. Fang, L. et al. Mapping the protein interaction network of the human COP9 signalosome complex using a label-free QTAX strategy. *Mol. Cell Proteomics* **11**, 138-147 (2012).
46. Aphasizhev, R. & Aphasizheva, I. RNA Editing Uridylyltransferases of Trypanosomatids. *Methods in Enzymology* **424**, 51-67 (2007).

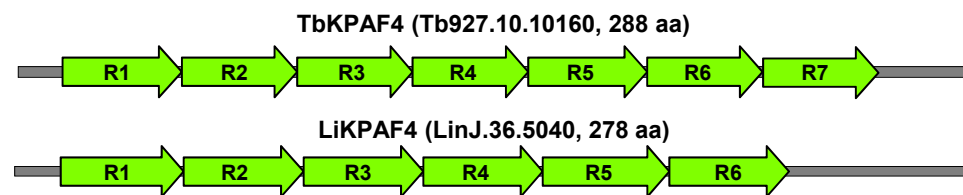

TbKPAF4, positions in the repeat: **5** **35/last**

|    |                                               |   |   |     |
|----|-----------------------------------------------|---|---|-----|
| R1 | 14 SRWLTDDELVALSKAGNWEAAISTFLQLQGANIVQSN 49   | T | N | = A |
| R2 | 50 VFHYTTVISACGRAGKWEAAMSIFDQMTKNEVKPN 84     | T | N | = A |
| R3 | 85 VYTYTAVINACASAEKADVALRMFAHMRLADVPPN 119    | T | N | = A |
| R4 | 120 VQTM TALVNACARSGEWERA IKILRDCEELFVAPN 154 | T | N | = A |
| R5 | 155 VFTYTAAMDGCRRGGVWKP AVDLLNEMRDPTRVRPN 190 | T | N | = A |

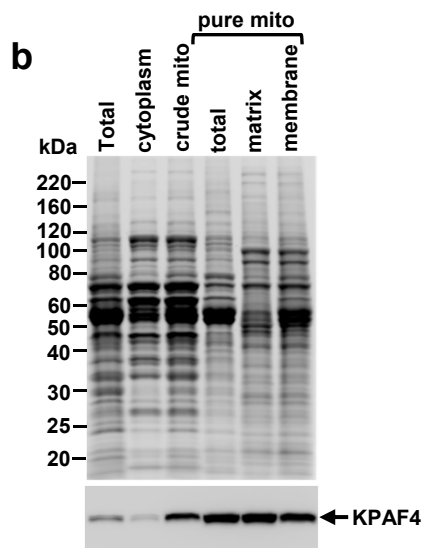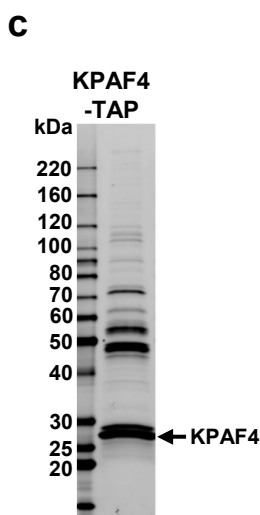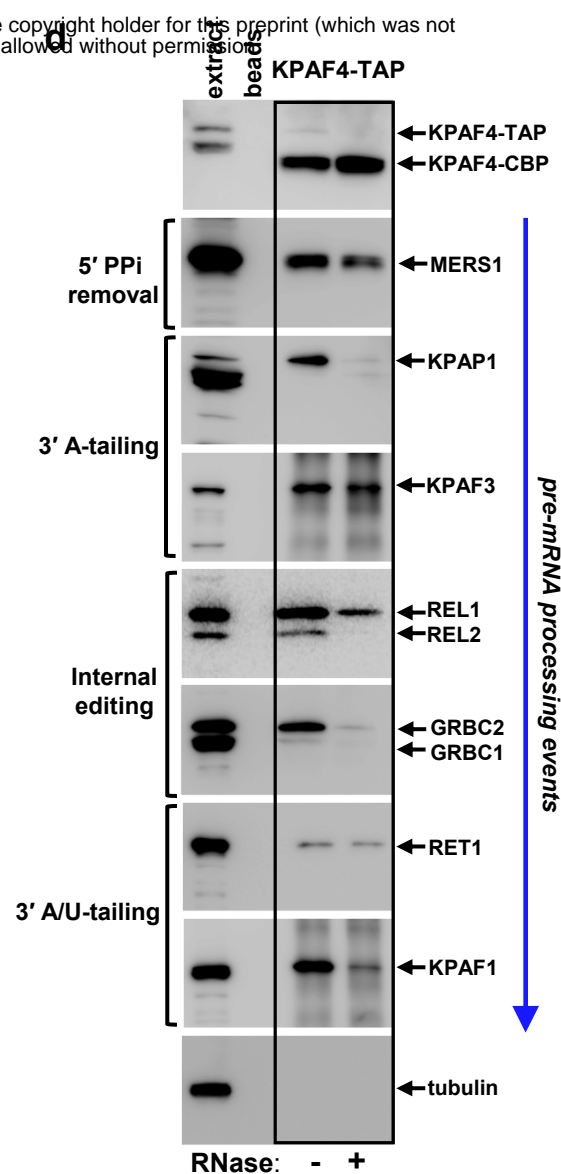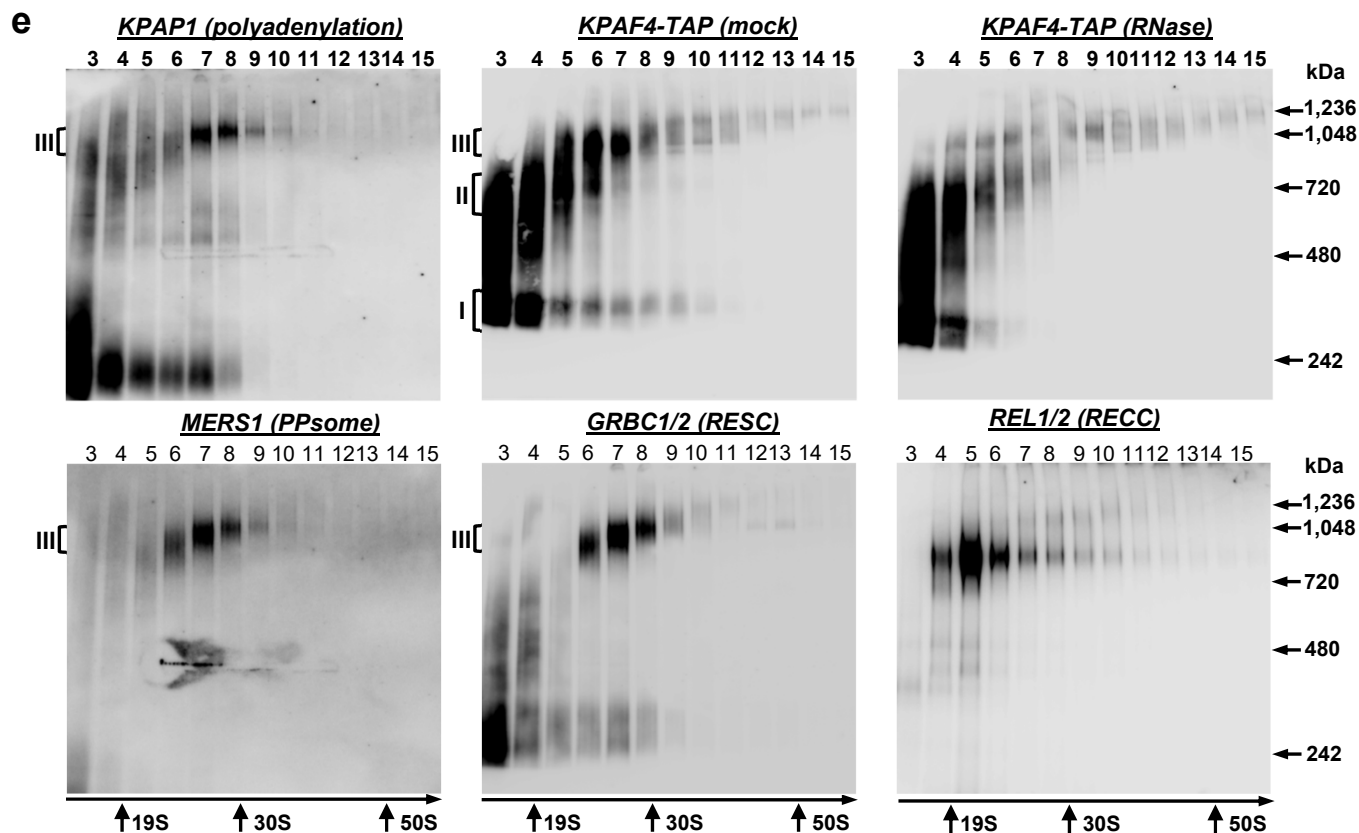

a

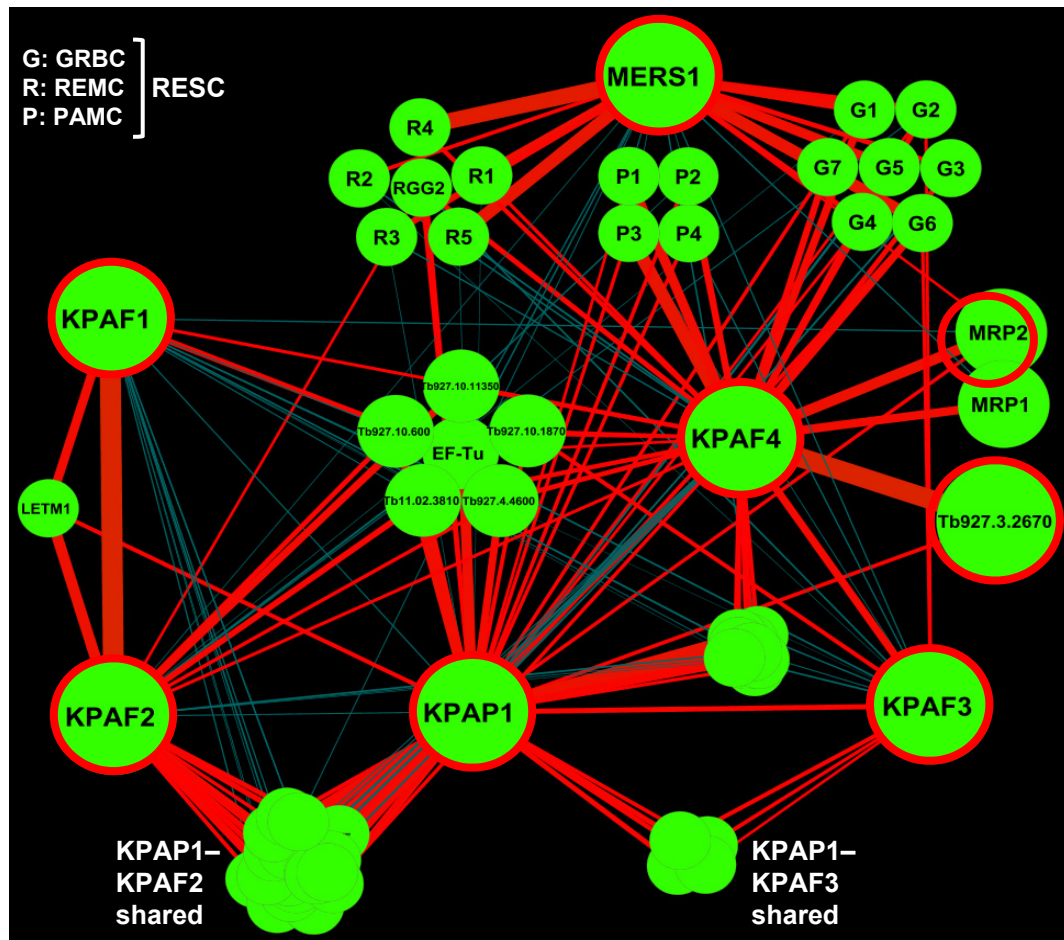

b

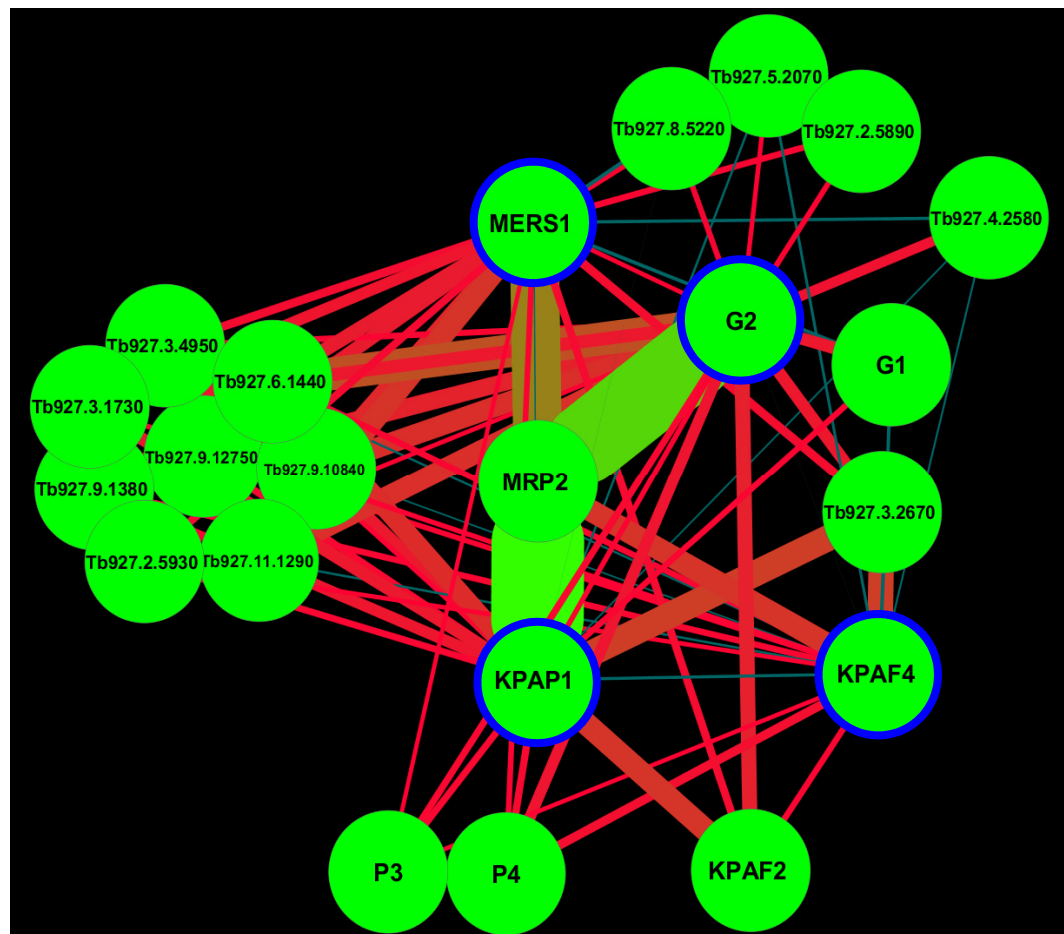



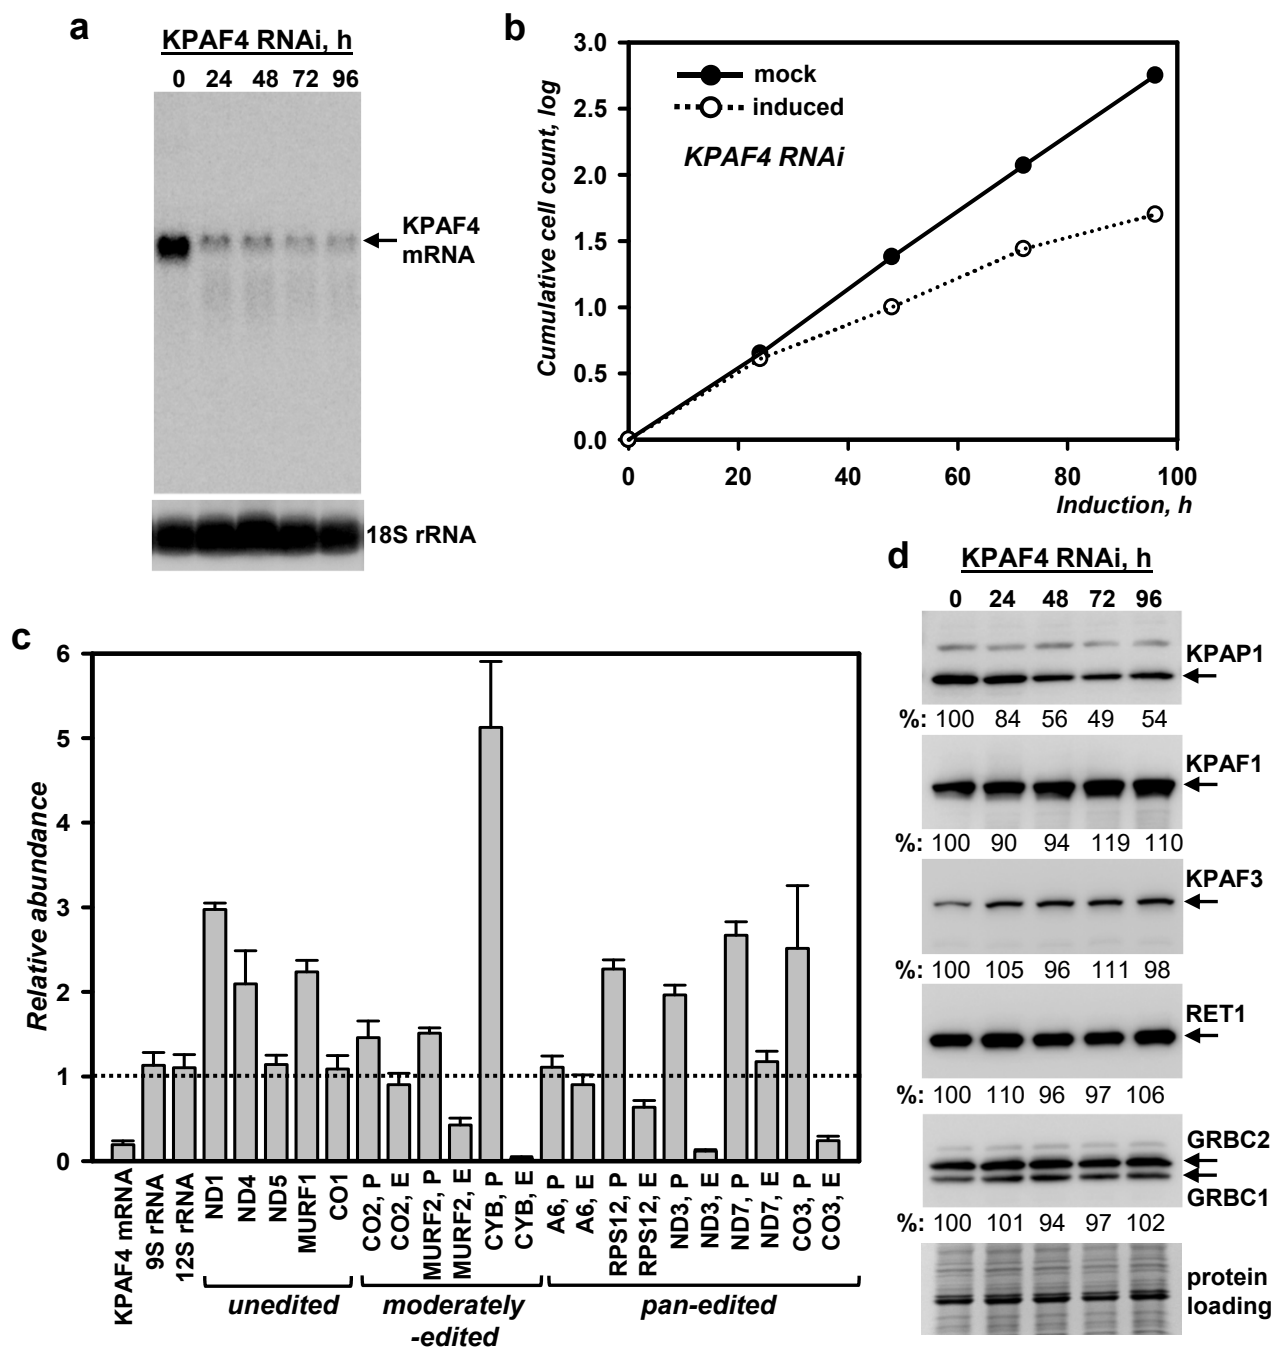

Fig. 3.

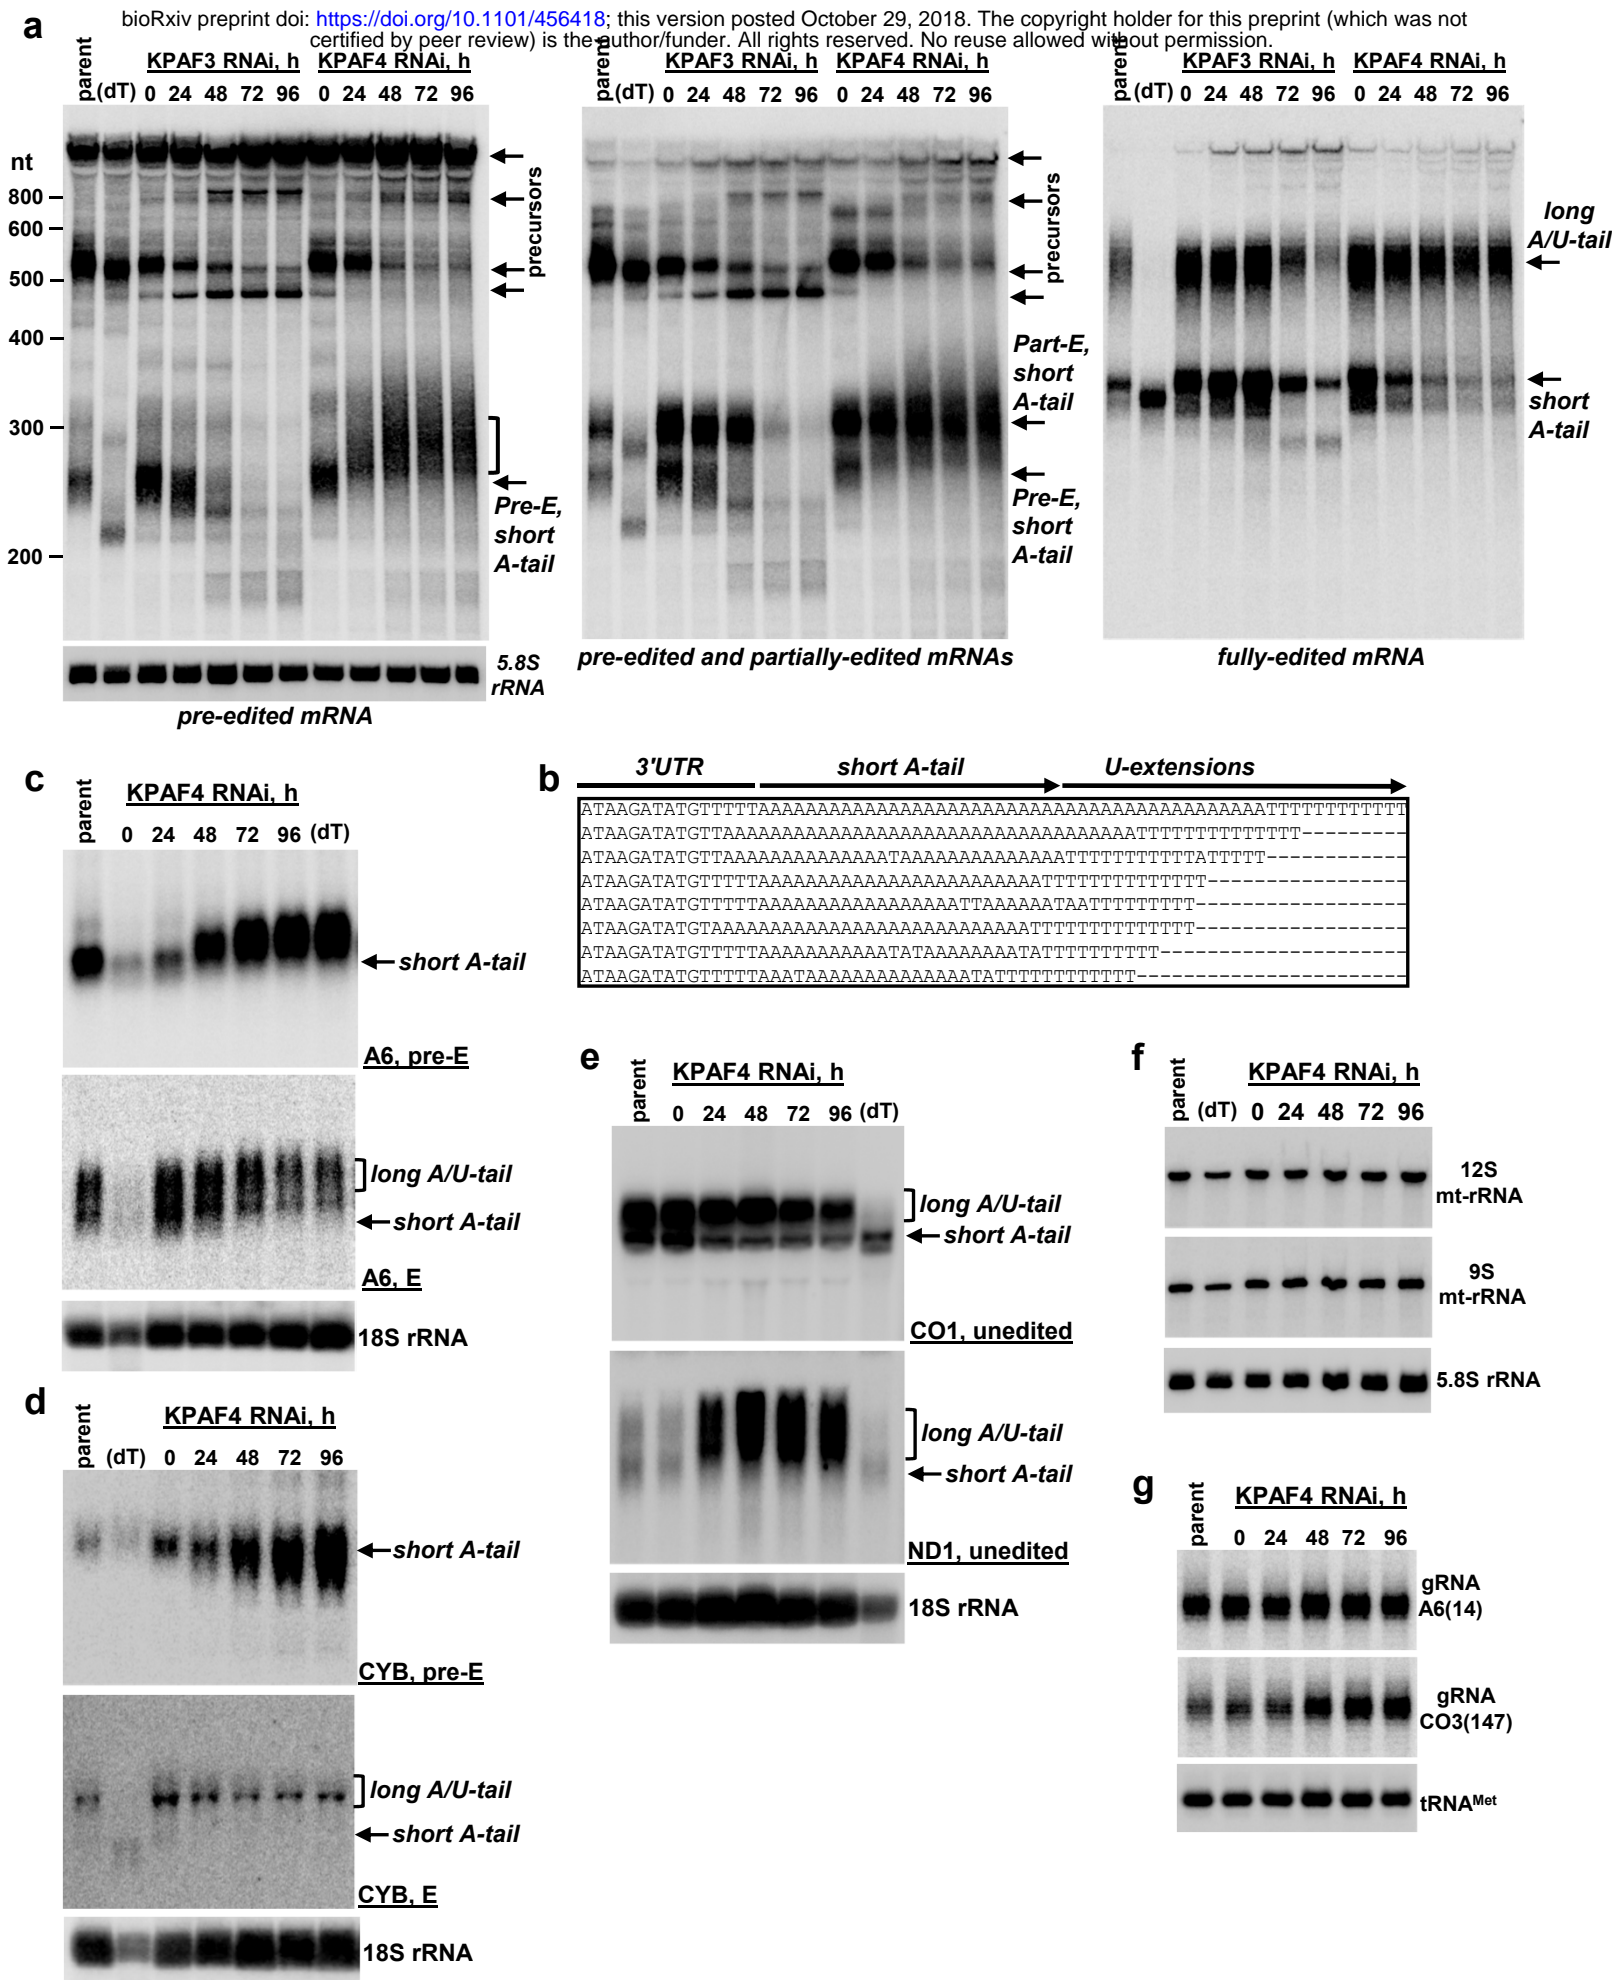

Fig. 4.

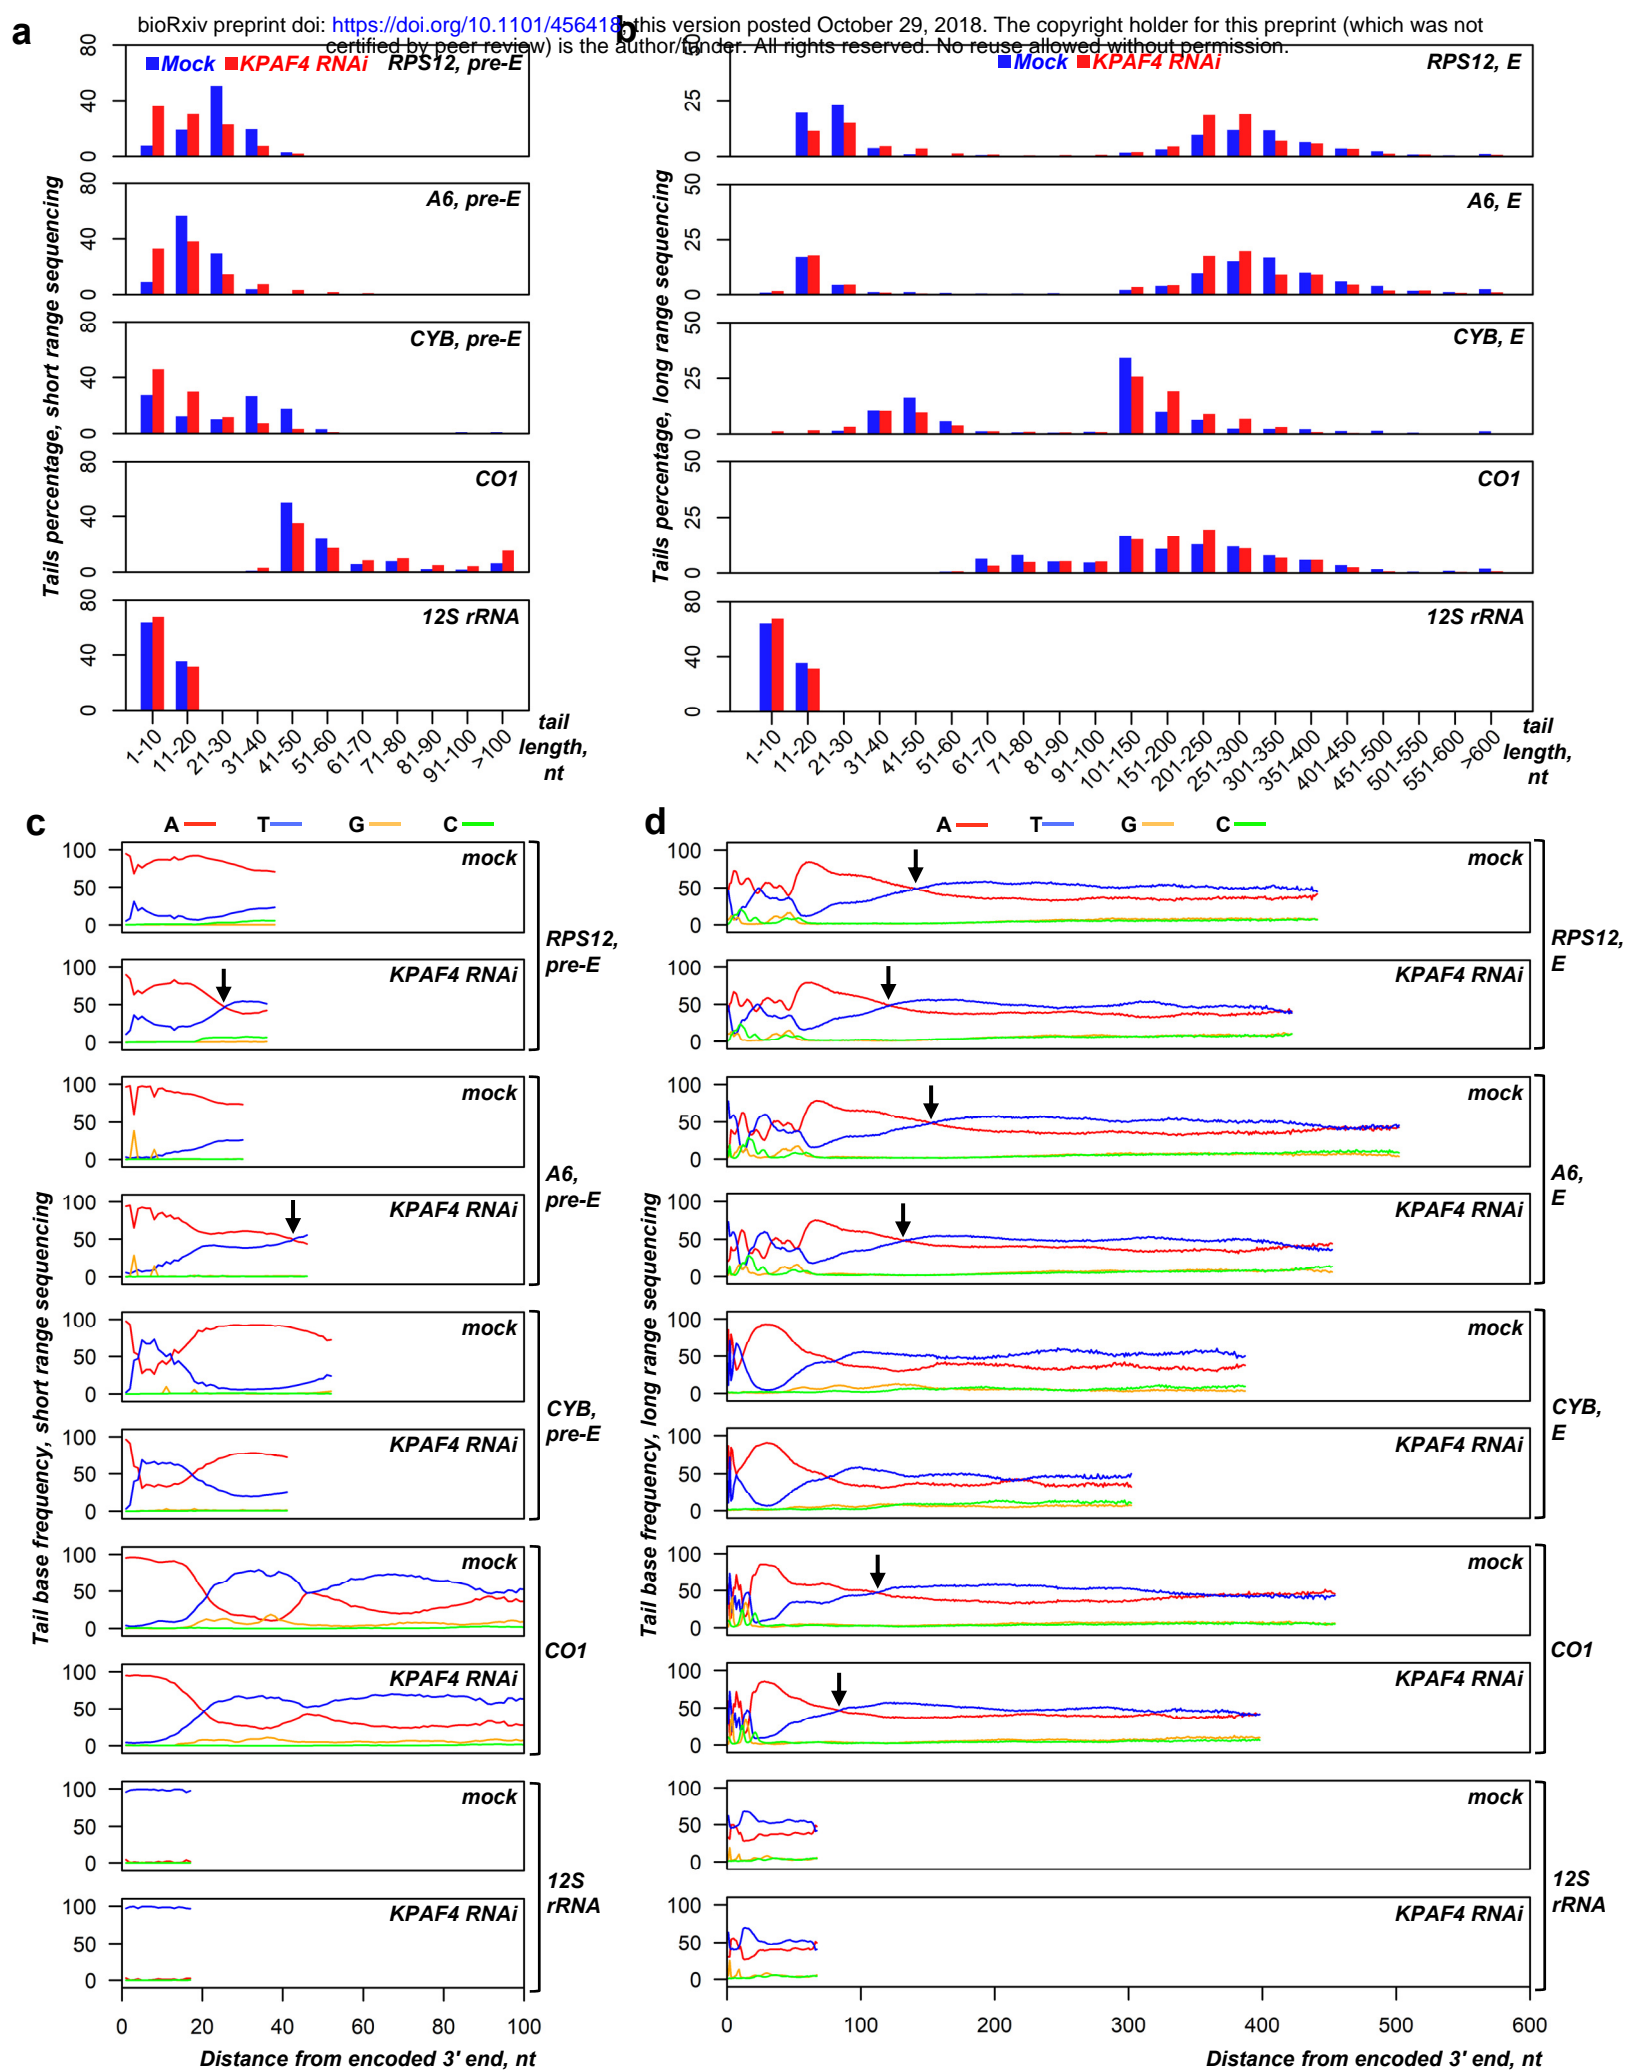



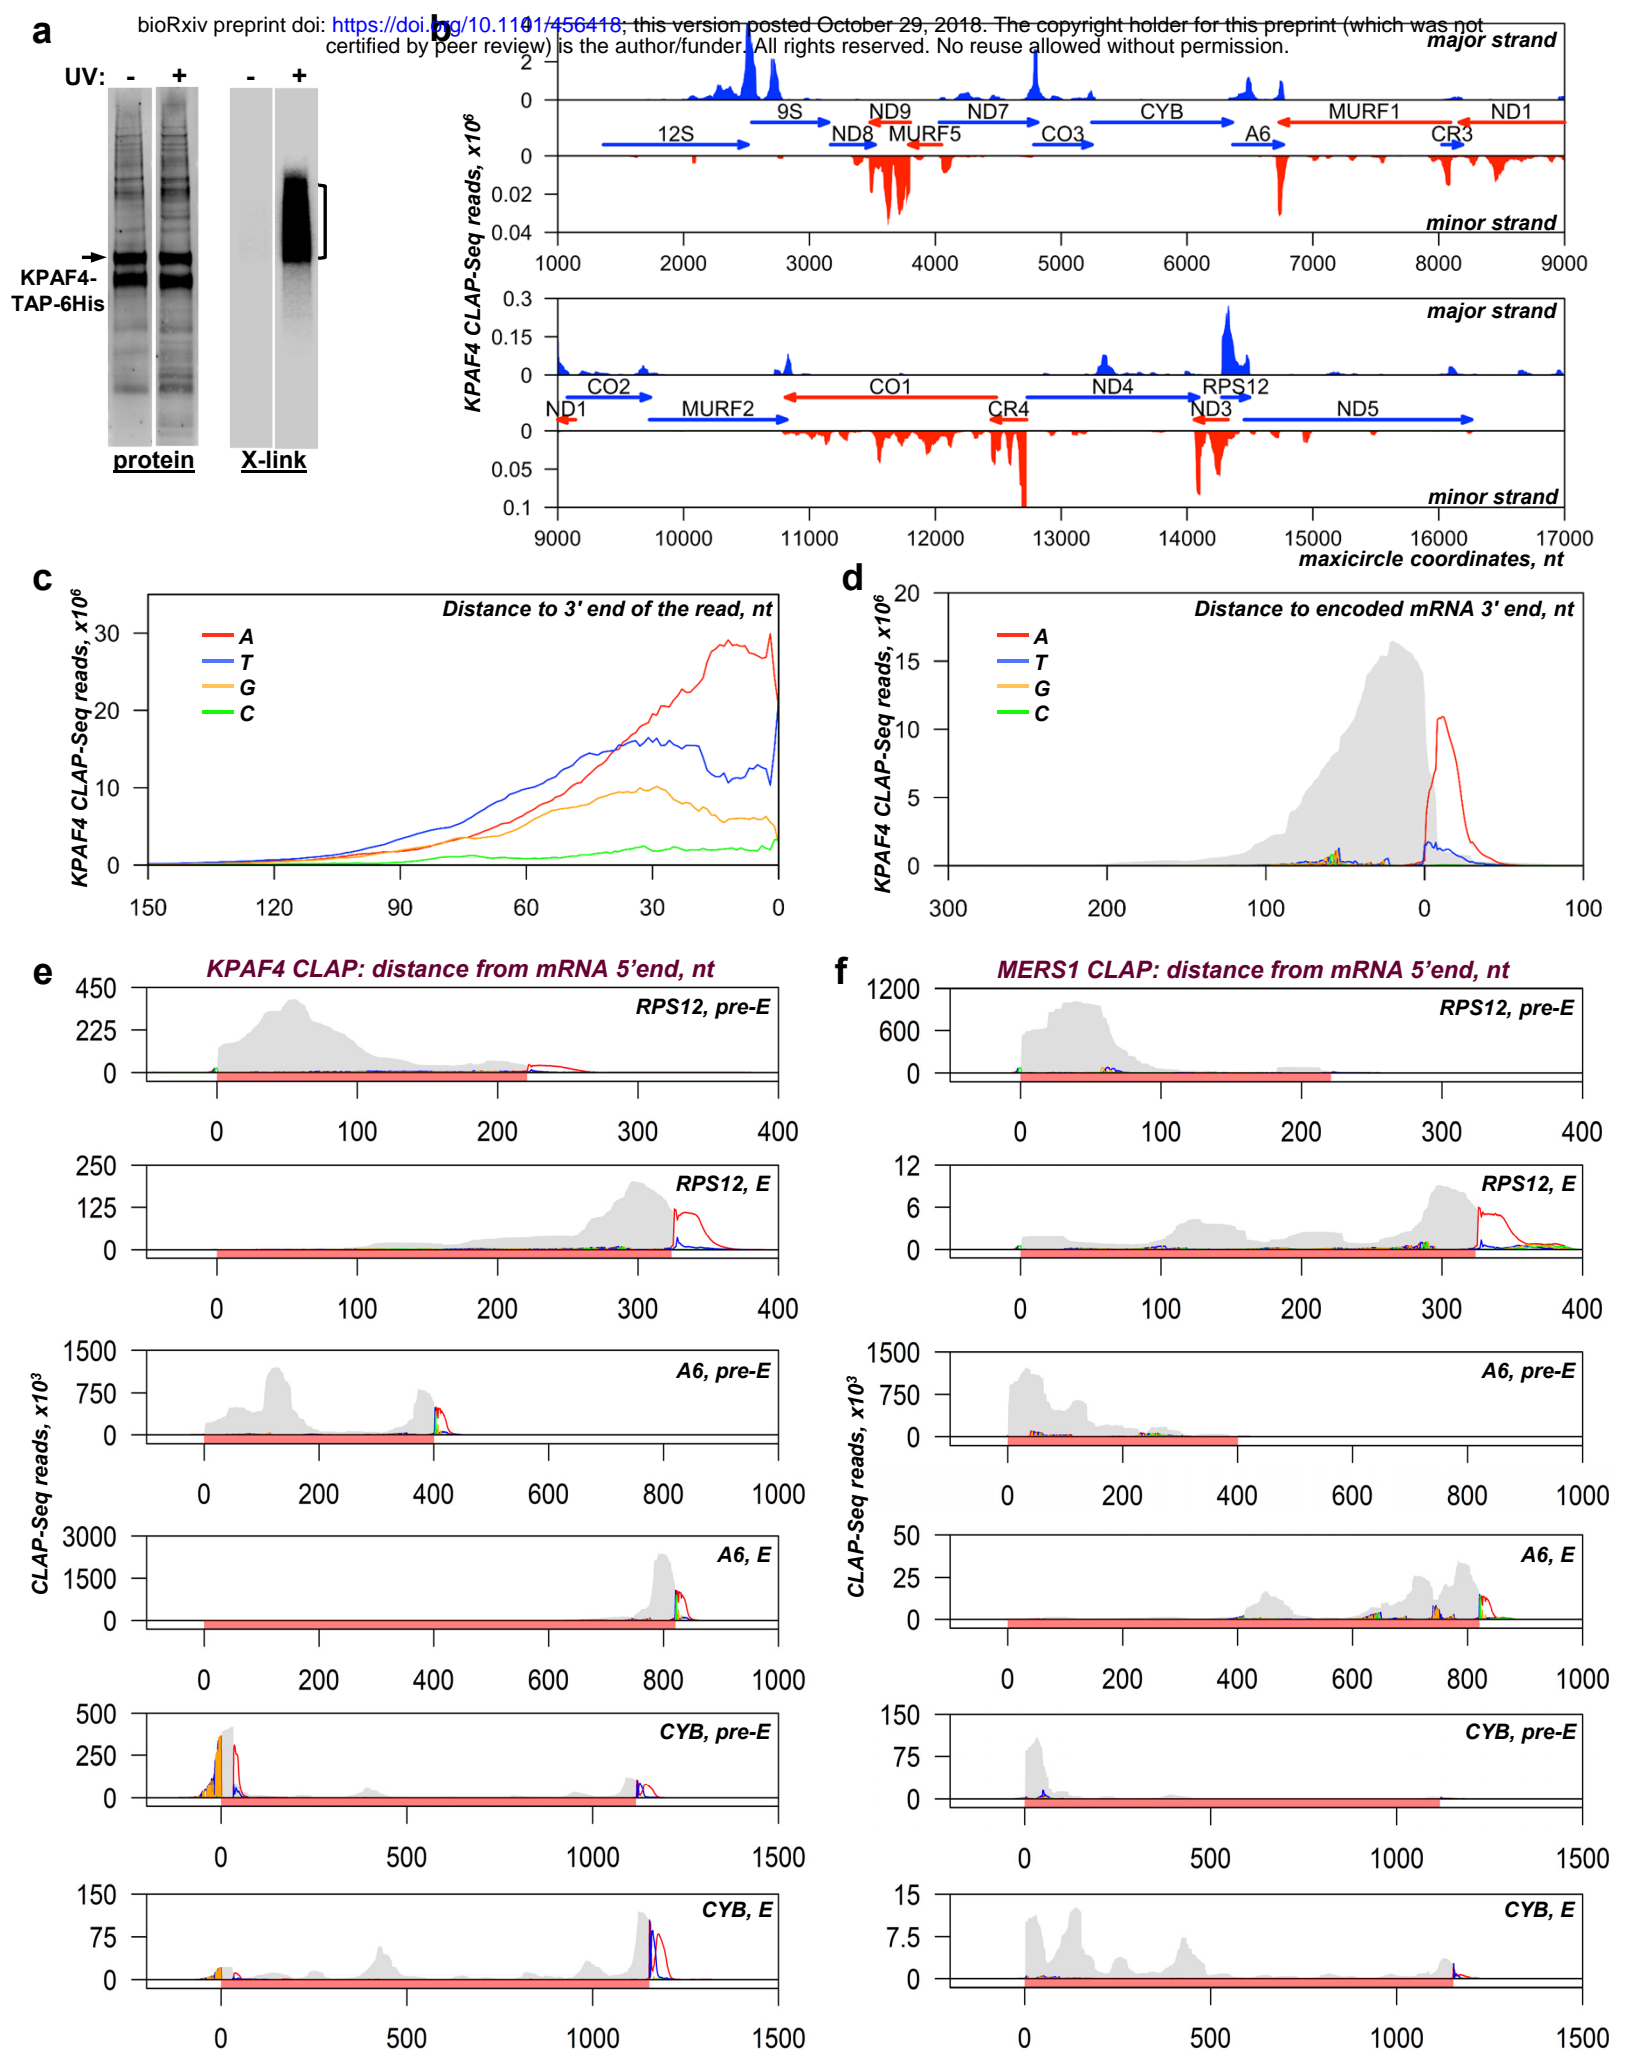

Fig. 6.

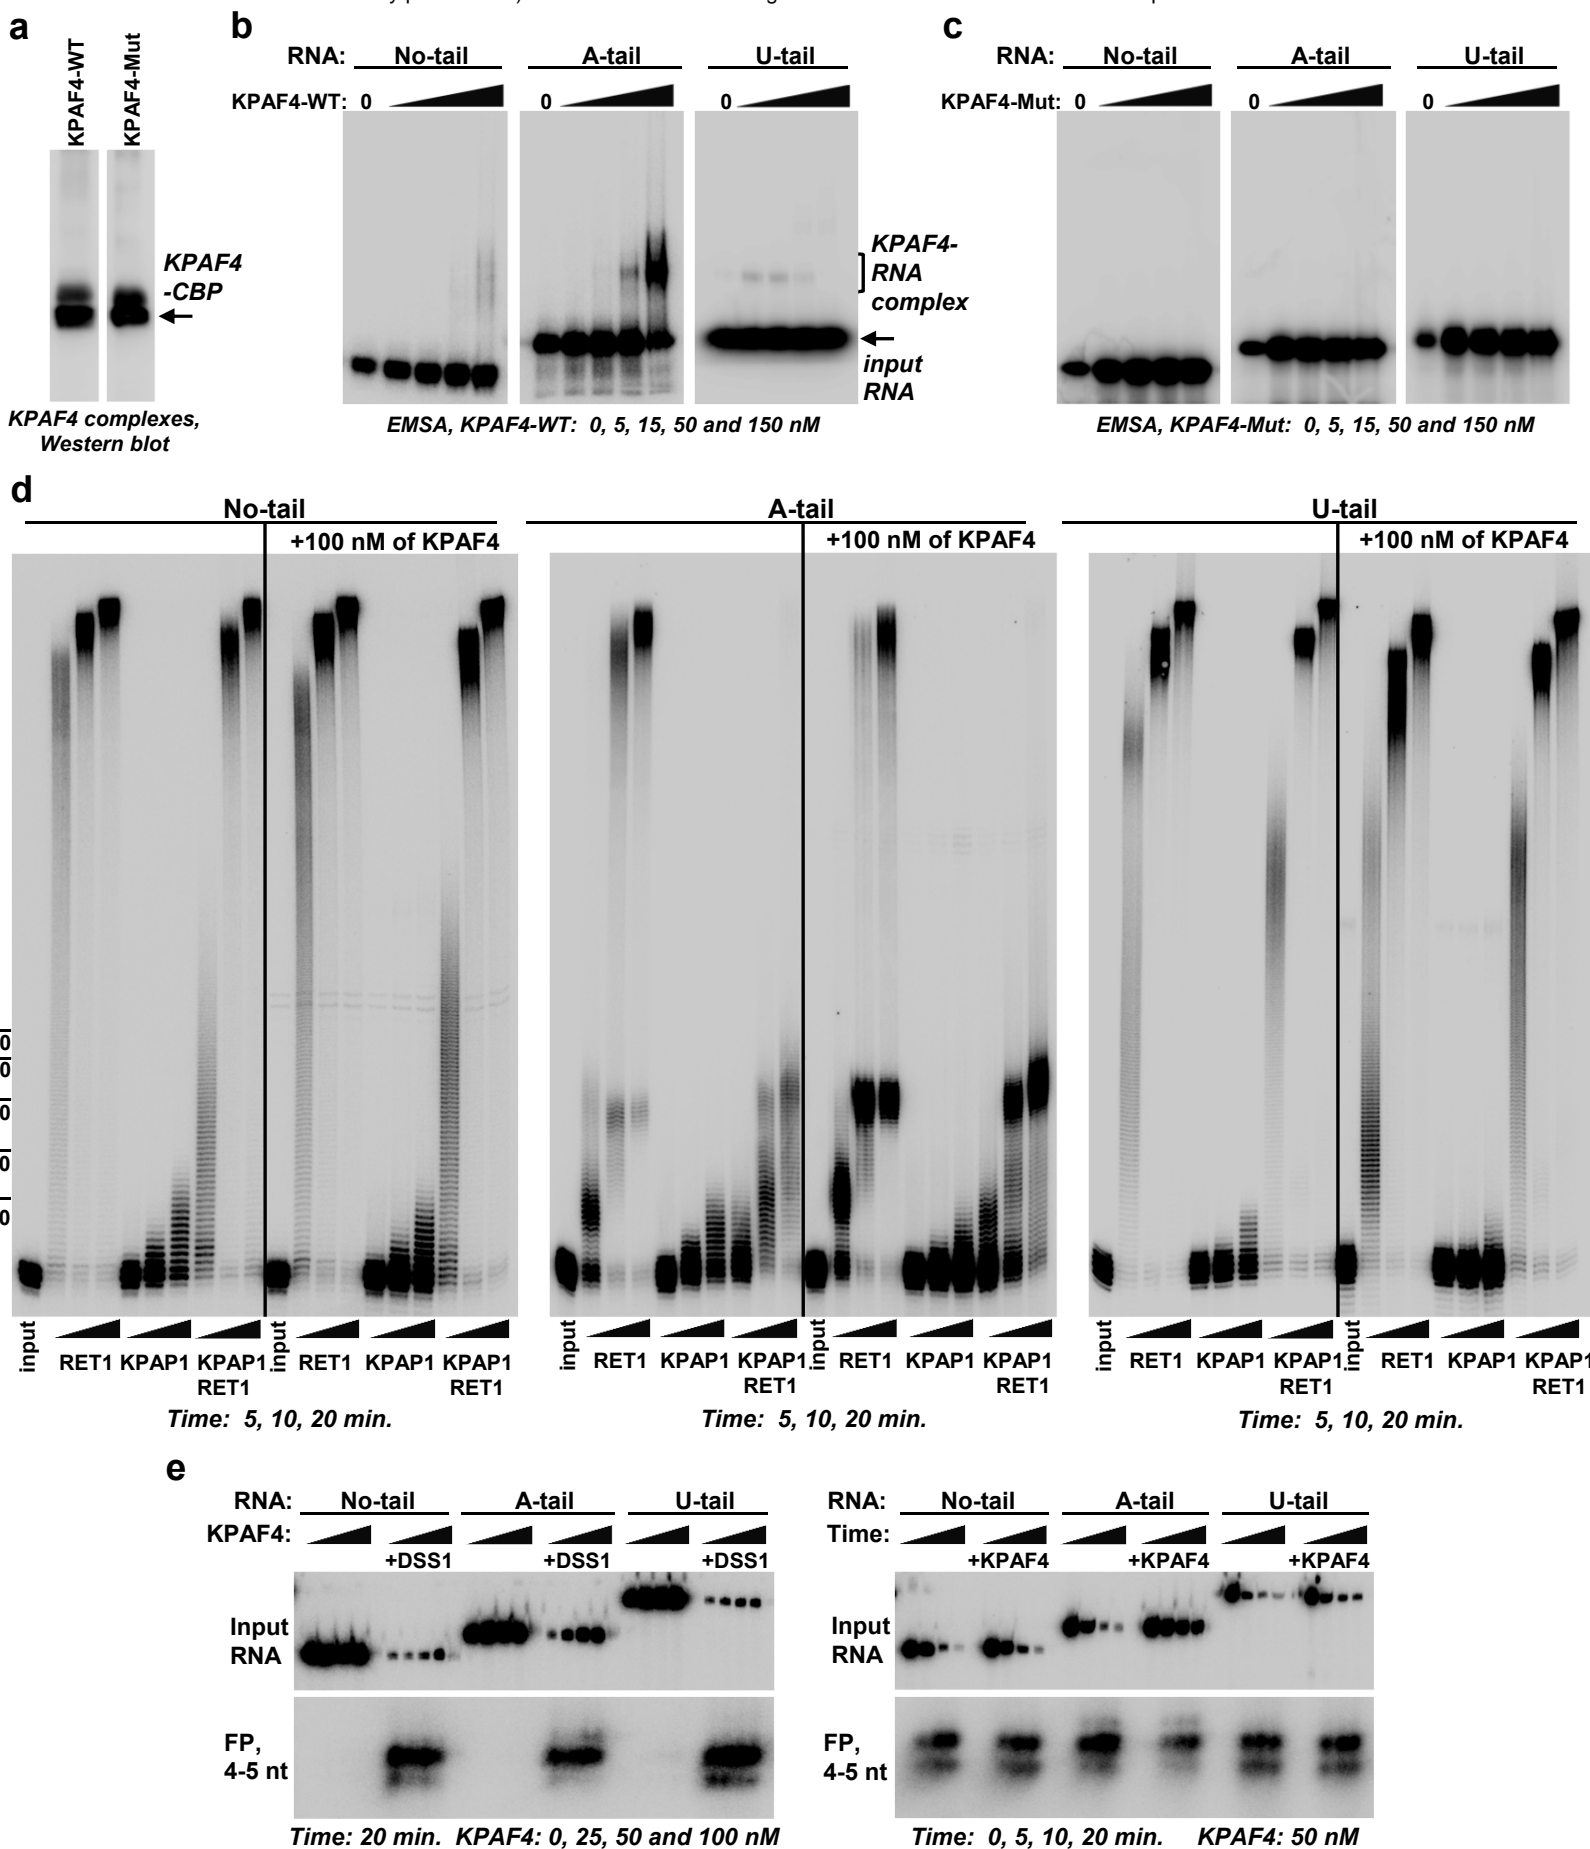

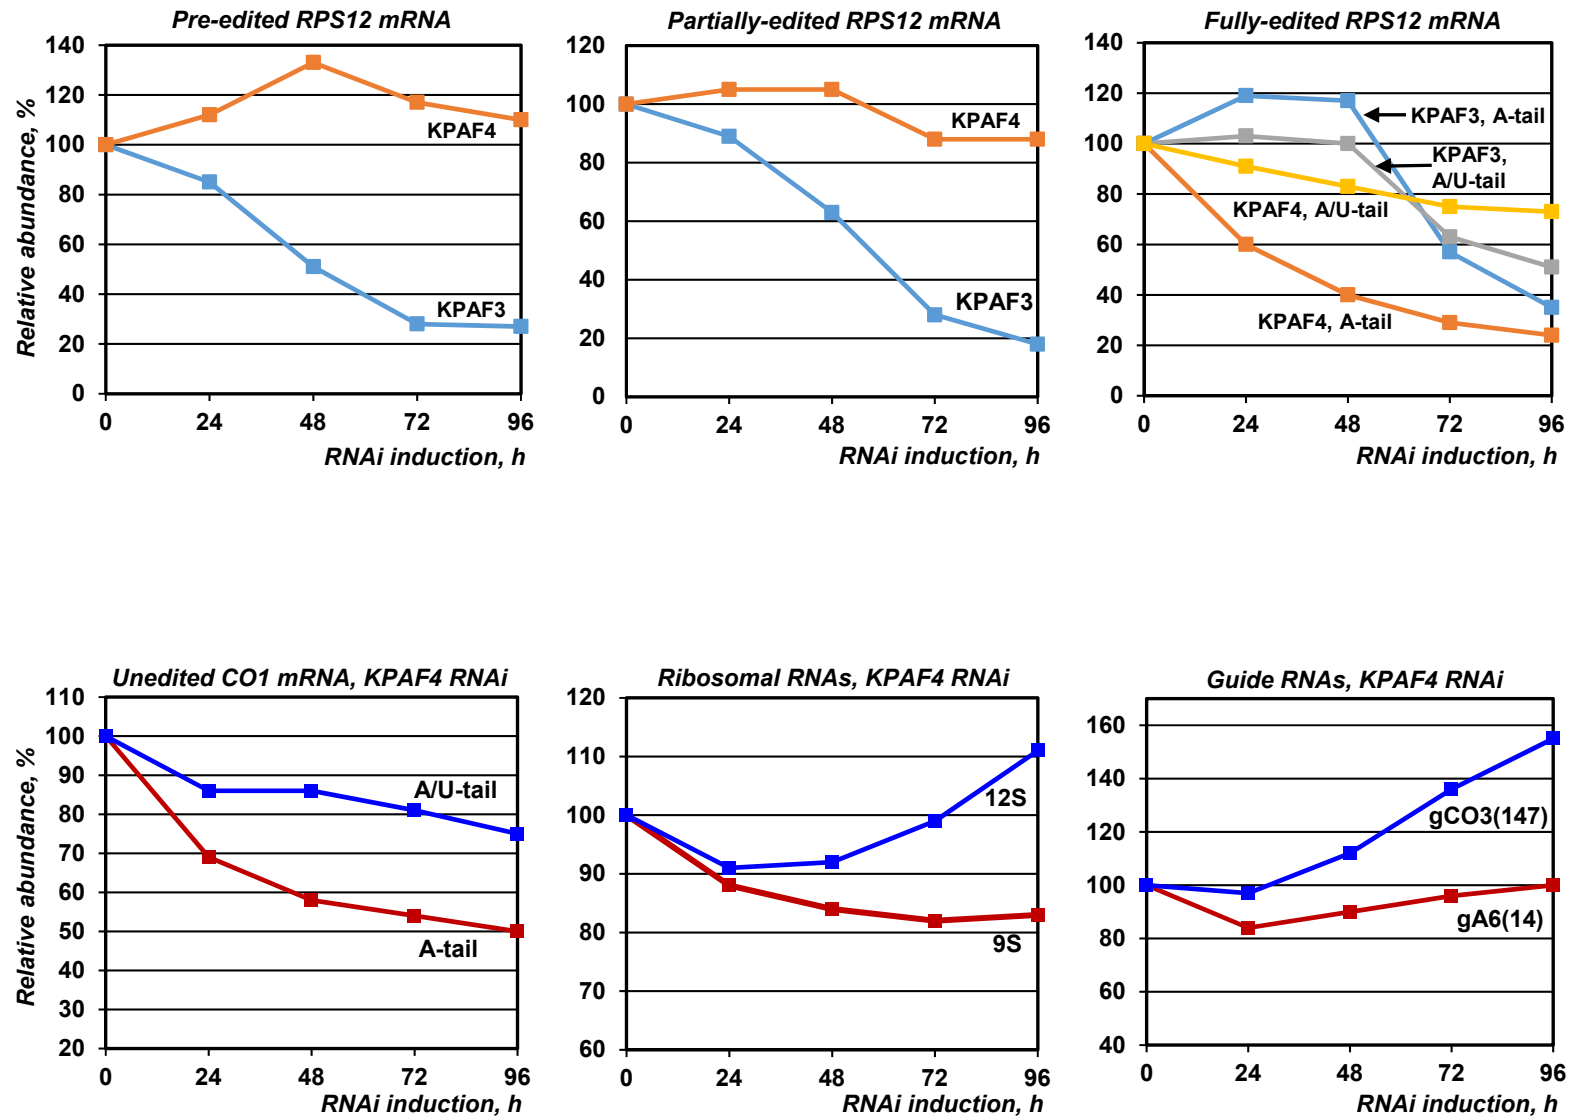

**Supplementary Figure 1.** Quantitation of northern blotting images shown in Fig. 4. Non-saturated signals were acquired with phosphor storage screen and quantitated vs. indicated nuclear encoded RNAs.

**a**

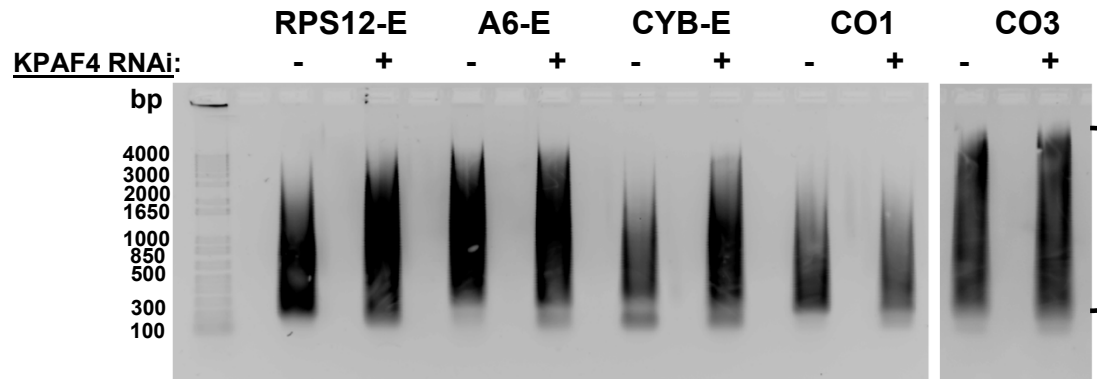

**b**

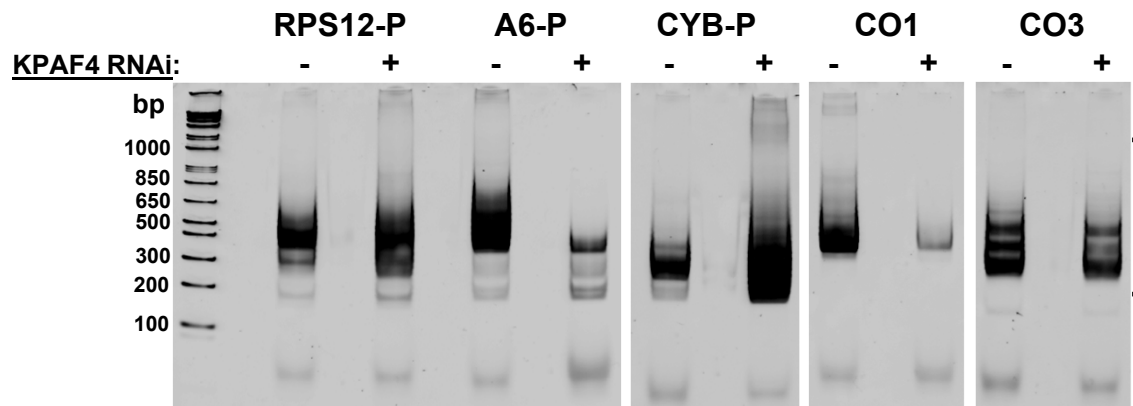

**Supplementary Figure 2.** Circular RT-PCR libraries for 3' extension analysis. DNA was extracted from regions indicated by brackets. A. SMRT libraries were purified by electrophoresis in 1.2% agarose gel. B. RNA-Seq libraries were purified by electrophoresis in 5% polyacrylamide gel.

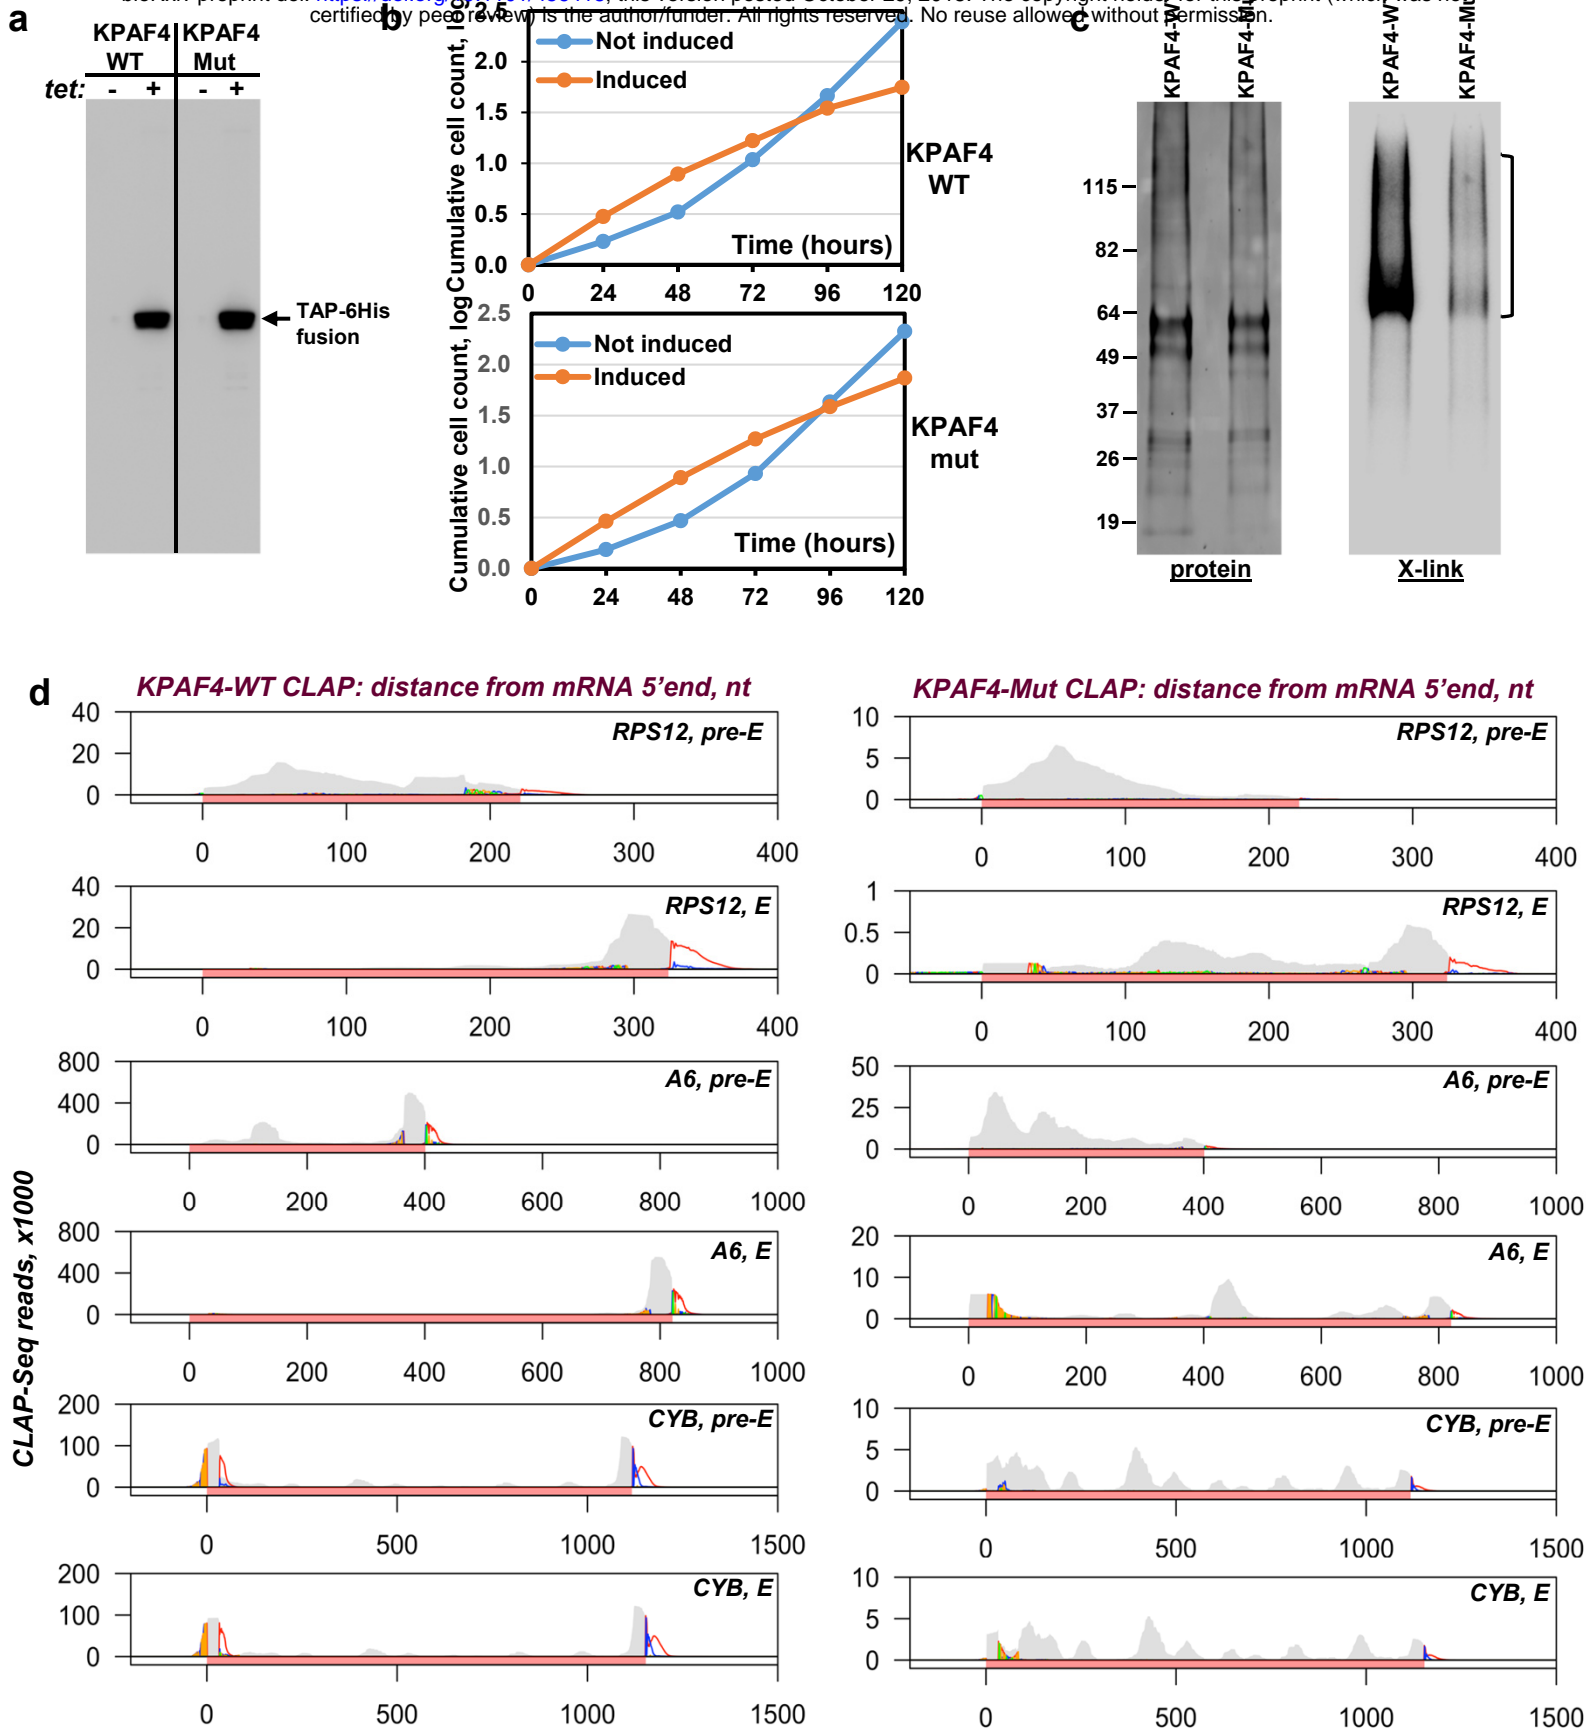

**Supplementary Figure 3.** KPAF4-Mut expression and *in vivo* binding sites analysis. (a). Inducible KPAF4-WT and KPAF4-Mut expression. Cell lysates were analyzed by western blotting with anti-CBP antibody. (b). Parasite growth kinetics after KPAF4-WT and KPAF4-Mut expression. (c) Isolation of *in vivo* KPAF4-RNA crosslinks. Sequenced area is indicated by brackets. (d) Crosslinked fragments were mapped to representative mitochondrial mRNAs.

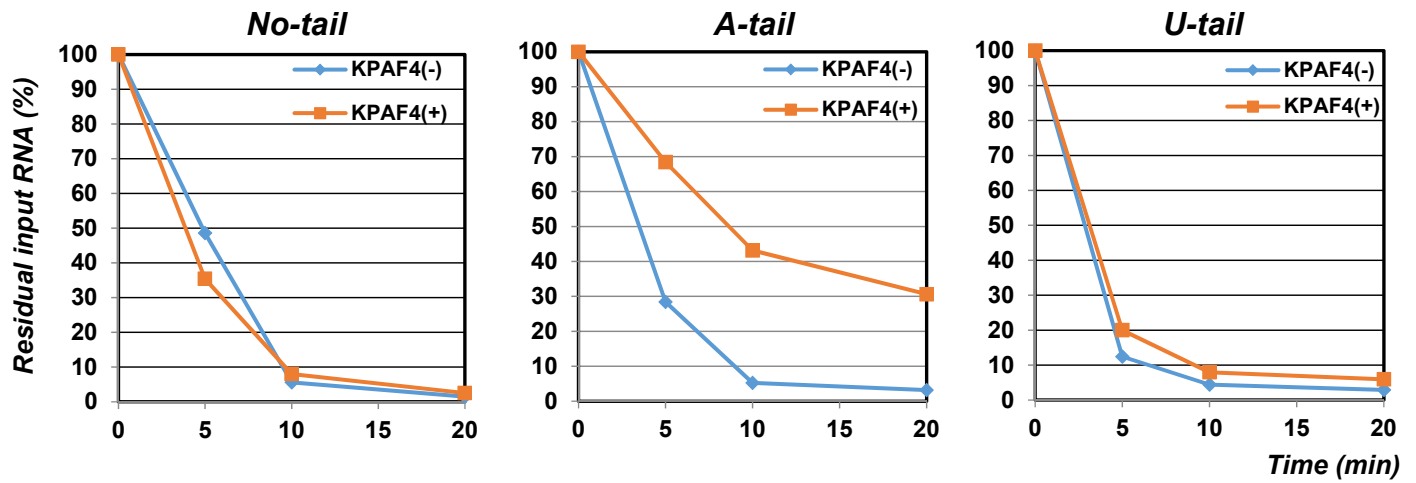

**Supplementary Figure 4.** Quantitation of input RNA decay in Fig. 7E. Non-saturated signals were acquired with phosphor storage screen and quantitated vs. input RNAs.
